# Supplementary material for: Comparison of the contributions of female and male authors to medical research in 2000 and 2015: a cross-sectional study
Source: PubMed Central journal article supplement — BMJ Open. 2019 Feb 13;9(2):e024436. doi: 10.1136/bmjopen-2018-024436 (PMC6398775; doi:10.1136/bmjopen-2018-024436), 2019-02-13
Supplement: bmjopen-2018-024436.draft_revisions.pdf [file bmjopen-2018-024436.draft_revisions.pdf]

# BMJ Open

BMJ Open is committed to open peer review. As part of this commitment we make the peer review history of every article we publish publicly available.

When an article is published we post the peer reviewers' comments and the authors' responses online. We also post the versions of the paper that were used during peer review. These are the versions that the peer review comments apply to.

The versions of the paper that follow are the versions that were submitted during the peer review process. They are not the versions of record or the final published versions. They should not be cited or distributed as the published version of this manuscript.

BMJ Open is an open access journal and the full, final, typeset and author-corrected version of record of the manuscript is available on our site with no access controls, subscription charges or pay-per-view fees (<http://bmjopen.bmj.com>).

If you have any questions on BMJ Open's open peer review process please email [info.bmjopen@bmj.com](mailto:info.bmjopen@bmj.com)

# BMJ Open

## Comparison of the contributions of female and male authors to medical research over a 15-year time span: a cross-sectional study

|                               |                                                                                                                                                         |
|-------------------------------|---------------------------------------------------------------------------------------------------------------------------------------------------------|
| Journal:                      | <i>BMJ Open</i>                                                                                                                                         |
| Manuscript ID                 | bmjopen-2018-024436                                                                                                                                     |
| Article Type:                 | Research                                                                                                                                                |
| Date Submitted by the Author: | 25-May-2018                                                                                                                                             |
| Complete List of Authors:     | Gayet-Ageron, Angele; Geneva University Hospitals, Clinical Epidemiology<br>Poncet, Antoine<br>Perneger, Thomas; HUG, Division of clinical epidemiology |
| Keywords:                     | Gender, Publication, Research, Authorship                                                                                                               |
|                               |                                                                                                                                                         |

SCHOLARONE™  
Manuscripts

Review only

1  
2  
3 **Comparison of the contributions of female and male authors to medical**  
4  
5 **research over a 15-year time span: a cross-sectional study**  
6  
7

8 Angèle Gayet-Ageron, MD, PhD<sup>1</sup>, Antoine Poncet, MS<sup>2</sup>, Thomas V Perneger, MD, PhD<sup>3</sup>  
9  
10

11  
12  
13  
14 <sup>1</sup> Senior physician, Division of Clinical Epidemiology, University Hospitals of Geneva and,  
15 Faculty of Medicine, Geneva, Switzerland  
16

17  
18  
19 <sup>2</sup> Statistician, Division of Clinical Epidemiology, University Hospitals of Geneva and, Faculty  
20 of Medicine, Geneva, Switzerland  
21

22  
23  
24 <sup>3</sup> Head, Division of Clinical Epidemiology, University Hospitals of Geneva and, Faculty of  
25 Medicine, Geneva, Switzerland  
26  
27  
28

29  
30  
31  
32 **Keywords:** Gender; Publications ; Research ; Authorship.  
33

34  
35 **Word count:** 2856.  
36  
37  
38  
39  
40

41 Corresponding author: Angèle Gayet-Ageron, MD, PhD, Division of Clinical Epidemiology,  
42 University Hospitals of Geneva, 6 Rue Gabrielle Perret-Gentil, 1211 Geneva 14, Switzerland.  
43  
44 Tel.: +41 22 372 9027; fax: +41 22 372 9035. Email: [angele.gayet-ageron@hcuge.ch](mailto:angele.gayet-ageron@hcuge.ch)  
45  
46  
47  
48  
49  
50  
51  
52  
53  
54  
55  
56  
57  
58  
59  
60

## Abstract

**Objectives:** The proportion of women engaged in clinical research has increased over time. However, it is unclear if women and men contribute to the same extent during the conduct of research and, if so, if they are equally rewarded by a strategic first or last author position. We aim to describe the prevalence of women authors of original articles published over a 15-year interval and to compare the research contributions and author positions according to gender.

**Design:** Repeated cross-sectional study.

**Setting:** Published original articles.

**Participants:** 1910 authors of 223 original articles published in the *Annals of Internal Medicine* in 2000 and 2015.

**Primary and secondary outcomes measures:** Self-reported contributions to 10 aspects of the article (primary) and author position on the byline.

**Results:** The proportion of women authors increased from 32% (n=243) to 41% (n=469) between 2000 and 2015 ( $p < 0.0001$ ). In 2000, women authors were less frequently involved than men in the conception and design (134 [55%] vs. 323 [61%];  $p = 0.0256$ ), critical revision (171 [70%] vs. 426 [81%];  $p = 0.0009$ ), final approval (196 [81%] vs. 453 [86%];  $p = 0.0381$ ), and obtaining of funding (39 [16%] vs. 114 [22%];  $p = 0.0245$ ). Women were more frequently involved than men in administration and logistics (85 [35%] vs. 137 [26%];  $p = 0.0188$ ) and data collection (121 [50%] vs. 242 [46%];  $p = 0.0532$ ), but they were similarly involved in the analysis and interpretation of data, drafting of the manuscript, provision of materials/patients, and statistical expertise. Women were less often last authors than men (22 [9%] vs. 82 [16%];  $p = 0.0102$ ). These gender differences persisted in 2015.

1  
2  
3  
4  
5  
6  
7  
8  
9  
10  
11  
12  
13  
14  
15  
16  
17  
18  
19  
20  
21  
22  
23  
24  
25  
26  
27  
28  
29  
30  
31  
32  
33  
34  
35  
36  
37  
38  
39  
40  
41  
42  
43  
44  
45  
46  
47  
48  
49  
50  
51  
52  
53  
54  
55  
56  
57  
58  
59  
60

**Conclusions:** The representation of women among authors of medical articles increased notably between 2000 and 2015, but still remained below 50%. Women’s roles differed from those of men with no change over time.

For peer review only

## Article summary

### Strengths and limitations of this study

- We used all original articles and reviews published in 2000 and 2015 in a single, widely-cited USA-based medical journal that provides a constant and standard format for reporting author contributions.
- We assessed 10 self-reported contributions of all authors of the selected original articles papers by gender over a 15-year period.
- We compared the authors' position on the byline by gender over a 15-year period after adjustment for their self-reported contributions.
- We did not obtain information on the authors' age, past experience in research, professorial rank, medical specialty and primary scientific discipline, which may all contribute to gender differences in specific research roles and this may decrease the interpretation of findings.

## Introduction

Over the past decades, the proportion of women in medical sciences has increased worldwide.<sup>1-5</sup> This demographic change should be associated in theory with a higher representation of women authoring scientific publications.<sup>6</sup> In principle, women should make equivalent contributions to research and have the same opportunity to lead research projects as men. Furthermore, we should observe increased numbers of women at academic leadership positions.<sup>5</sup> However, the chances of succeeding in research and obtaining a senior position are not the same for men and women with similar competencies.<sup>7</sup> Women face also more difficulties than men in finding a mentor to help them manage their careers and facilitate their advancement, and productivity.<sup>7,8</sup> Finally, women scientists are less likely than men to get funded or to coauthor scientific publications.<sup>9</sup> A recent publication demonstrated that the contribution differed between female and male authors of articles published in journals from the Public Library of Science (PLOS).<sup>10</sup>

Currently, we do not fully understand how gender differences in indicators of academic achievement occur. One possibility is that men and women researchers do essentially the same things, but are not rewarded equitably by grants, author roles or tenured positions. Alternatively, the roles of men and women researchers may be different due to different trajectories during their training, in which case the unequal rewards would be merely a consequence of these different skills and contributions (Figure 1). It is important to understand this, because remedial actions would not be the same for these two types of gender inequality. Many universities have implemented programmes to facilitate women's careers in science in the past decades.<sup>9,11</sup> The effectiveness of such programmes is usually assessed through the gender ratio of academic promotions. However, promotions reflect only a late outcome and we know little about changes in gender roles during the conduct of research.

1  
2  
3 To clarify these issues, we conducted a cross-sectional study of original articles  
4 published in the *Annals of Internal Medicine* 15 years apart. We selected this journal because  
5 it applies a standardized description of 10 possible roles of all authors and this description has  
6 remained stable over this time span. Our main objective was to compare the scientific  
7 contributions to medical research of female and male authors at both time periods and to  
8 determine if gender differences that may have been present in 2000 have narrowed or  
9 disappeared by 2015. Our secondary objective was to compare the authorship position of  
10 female and male authors with similar contributions to the research project and again to assess  
11 if there was a change between 2000 and 2015.  
12  
13  
14  
15  
16  
17  
18  
19  
20  
21  
22  
23  
24  
25  
26  
27  
28  
29  
30  
31  
32  
33  
34  
35  
36  
37  
38  
39  
40  
41  
42  
43  
44  
45  
46  
47  
48  
49  
50  
51  
52  
53  
54  
55  
56  
57  
58  
59  
60



## Methods

As the study was only based on a review of data publicly available online, prior approval from our institutional review board was not required for this study.

### Study design and population

We conducted a cross-sectional study of all original reports and reviews published in the *Annals of Internal Medicine* in two time periods: 1) from 1 January, 2000 to 31 December, 2000 and 2) from 1 January, 2015 to 31 December, 2015. Consensus statements, guidelines, clinical case reports and opinion papers were excluded because the author contributions criteria list does not fully fit these papers. All authors of the original research papers were included in the study population.

### Study variables

The main independent variables were the time period and author gender. We determined the gender of each author from their first names. If an author's gender was unclear to us, we used an internet search to find photographs and/or bibliographical information on the author. If this search was unproductive, we looked up the common usage of the first name.

The main dependent variables were the 10 possible contributions to the research paper as published in the *Annals*: 1) conception and design; 2) analysis and interpretation of the data; 3) drafting of the article; 4) critical revision of article for important intellectual content; 5) final approval of the article; 6) provision of study materials or patients; 7) statistical expertise; 8) obtaining of funding; 9) administrative, technical or logistic support; and 10) collection and assembly of data. We also retrieved the author's rank on the byline in five categories: first, second, middle, next-to-last and last positions. If there were four authors, the

1  
2 middle author position was omitted; if there were three authors, the next-to-last position was  
3  
4 also omitted; when there were two authors, the second position was omitted. In the case of a  
5  
6 joint first author, the second position was not considered. We compared the first, second,  
7  
8 next-to-last, and last positions to the middle rank.  
9  
10

11  
12 Other variables collected at the author level were: degrees (MD or other medical degree  
13  
14 such as MBBS or DO, with or without an additional Master's degree or PhD; any PhD or  
15  
16 other doctoral degree alone, such as ScD or JD; any Master's degree alone), home institution  
17  
18 (university, including public health schools; medical school or hospital; public agency;  
19  
20 industry; foundation or other non-profit; contract research organisation or consulting firm,  
21  
22 including individuals who gave only a street address), country of affiliation (USA, Canada,  
23  
24 Europe, and other). An independent variable at the article level was the type of funding  
25  
26 (industry funding and specific non-industry funding). For each article, variables were  
27  
28 collected from the online publication by one of the investigators (AGA, AP or TP) following  
29  
30 pre-specified rules. Uncertainties were solved by discussion and consensus between  
31  
32 investigators.  
33  
34  
35  
36  
37  
38  
39  
40

### 41 **Sample size estimation**

42 An initial analysis of authorship profiles used all papers published in 2015.<sup>12</sup> For this analysis  
43  
44 of time trends and gender, we added all papers published in 2000. The study had a >90%  
45  
46 power to detect a difference in the prevalence of female authors of 10% (e.g., 40% vs. 50%),  
47  
48 even in the presence of a design effect of 2 due to intra-article correlation of author gender.  
49  
50  
51  
52  
53  
54  
55  
56  
57  
58  
59  
60

## Statistical analysis

We described data at the author level. We presented the author characteristic, contribution to publication and position on the byline by gender and by year of publication (2000 and 2015).

First, we tested if the proportion of women varied between 2000 and 2015 by means of a mixed-effects logistic regression model with author gender as the dependent variable, a random effect at the article level, and fixed effect on the year of publication. Then we assessed if every author characteristic (degree, home institution, country of affiliation) was associated with gender using three mixed-effects models as previously described (adding a fixed-effect on the author characteristic) and if each of these associations remained stable over time by including an interaction term between the year and the author characteristic.

We assessed the association and its evolution over time between gender and 10 specific contributions to research paper. We built 10 mixed-effects logistic regression models where the contribution was the dependent variable, the article was the random factor, and gender was the main fixed factor. In each model, we included the year and an interaction term between the year and gender to assess change over time. Finally, we reassessed these associations after adjustment for academic degrees. We reported both univariate and multivariable odds ratios (ORs) and 95% confidence intervals (95% CI) by the year of publication.

Finally, to identify if gender was associated with a specific position on the article byline, we performed four conditional logistic regression models where each article defined a cluster, with author position (e.g. first vs. middle rank) as the dependent variable and gender the main predictor. We included the year and an interaction term between the year and gender to assess if there was a change over time of the associations between gender and author position. Then we adjusted the models for the 10 authors' contributions to research. We built

1  
2  
3 four models, comparing the first, second, next-to-last and last position to middle position. In  
4 these models, articles with four or fewer authors were excluded from the analyses.  
5  
6

7  
8 All analyses were performed using STATA version IC 15 for Windows (STATA Corp.,  
9 College Station, Texas.). Statistical significance was defined as  $p < 0.05$  (two-sided).  
10  
11  
12  
13  
14  
15

## 16 **Results**

17  
18  
19 We included 223 research papers published in the *Annals of Internal Medicine*; 104 articles in  
20 2000 and 119 in 2015 (53%). In total, 1910 authors were listed on the 223 papers; 771 in 2000  
21 and 1139 in 2015 (60%). The average number of authors per article was 7.4 (standard  
22 deviation [SD] 4.3; range 2-30) in 2000 and 9.6 (SD 5.4; range 2-29) in 2015. Thirty-six  
23 articles included four or fewer authors.  
24  
25  
26  
27  
28  
29

### 30 31 32 33 34 **Comparison of characteristics, contributions to research and position on the byline by** 35 **gender in 2000 and 2015**

36  
37  
38  
39 The proportion of women among authors increased by 10% between 2000 and 2015 (243  
40 [32%] vs. 469 [41%];  $p < 0.0001$ ; Table 1). At the paper level, one article was written only by  
41 women authors in 2000 (1%) vs. three articles in 2015 (3%); 17 articles were written only by  
42 men authors in 2000 (16%) vs. 12 articles in 2015 (10%), and 86 articles had mixed women  
43 and men authors in 2000 (83%) vs. 104 in 2015 (87%). In both years, women had an MD  
44 and/or PhD degree less frequently compared to men (Table 1). Women did not differ from  
45 men regarding their home institution in both years. There were some minor differences in the  
46 country of affiliation between women and men. We did not find any change over time in the  
47 proportions of women and men by author characteristic ( $p > 0.05$  for all interaction tests).  
48  
49  
50  
51  
52  
53  
54  
55  
56  
57  
58  
59  
60

### **Association between gender and contributions to research**

Women were less likely than men to contribute to the conception and design, critical revision of the article for important intellectual content, final approval of the article, and obtaining of funding, both in 2000 and 2015 (Table 2). In contrast, women contributed more frequently than men to administrative, technical or logistic support and to the collection and assembly of data both in 2000 and 2015. We did not find any statistical interactions between gender and year of publication for each of the 10 contributions, i.e., no evidence of gender roles changing over time. After adjustment for academic degrees (Table 3), most gender differences were attenuated, which indicates that training explains part of the gender-related differences, except for statistical expertise. However, this adjustment showed also that women contributed significantly less to statistical expertise than men in 2000 and 2015.

### **Association between gender and author position on the byline**

Women were more frequently in second position and less frequently in last position compared to men (Table 2). Gender differences in author rank did not change over time. After adjustment for author contributions (Table 4), the gender difference in last author positions disappeared in both years. Furthermore, women appeared to be more likely to be listed second on the byline (significantly so in 2000) and less likely to be next-to-last (significantly so in 2015).

## Discussion

Our main finding is that the contributions to research of women and men authors differ considerably and that these gender roles have remained essentially unchanged between the years 2000 and 2015. At both time periods, women participated less frequently than men in study conception and design, statistical expertise, critical revision of the article, and obtaining of funding, but contributed more frequently to collection and assembly of data and to administrative, technical and logistic support. Regarding their place on the article byline, women were less likely to be last authors compared to men, again at both time periods. Nevertheless, the proportion of female authors has increased by 10% between 2000 and 2015. While this reflects progress toward equal gender representation in research, the proportion of women is still well below 50%.

Our study confirmed the trend toward a better representation of women in scientific publications. Underrepresentation of women in science and in medical fields in particular has been a constant finding over the past several decades.<sup>13</sup> This has prompted the launch of national programmes to improve the participation and advancement of women in academic careers.<sup>11</sup> The recent increase of female authors in scientific publications may be attributed to these initiatives. Similar to our study, Jagsi et al. reported an increase of women with a MD degree among the first and senior authors in six major journals between 1970 and 2004, including the *Annals of Internal Medicine*.<sup>14</sup> Filardo et al. described an increase from 28% in 1994 to 38% in 2014 in the proportion of female first authors in six prominent medical journals, also including the *Annals of Internal Medicine*.<sup>15</sup> However, the proportions of female authors reported in scientific publications in the 2000s have remained below 50%. This may be due to women's preference for clinical and teaching duties over research.<sup>16</sup> However, even if this were the case, why women would make such choices is an intriguing question.

1  
2  
3 An important finding of our study is the gender gap in research roles as captured by  
4 author contributions. This confirms the results of Macaluso et al. who showed that female  
5 authors in the PLoS journals were significantly less likely to be associated with analysis,  
6 design, contributing materials or writing of the paper compared to male authors, but that  
7 women were more likely to be associated with experimentation.<sup>10</sup> We propose here some  
8 possible explanations. First, women researchers may be on average younger and less  
9 experienced than men. As the increase in the proportion of women in medical sciences is  
10 recent, it may be years before women acquire the competencies and acquire the independence  
11 leading to more credit and accountability of their research. However, the differences between  
12 women and men authors have hardly changed between 2000 and 2015 as we would expect if  
13 it was merely a question of catching up. We noted that a larger proportion of female authors  
14 had non-terminal degrees and this might explain the higher proportion of non-leadership roles  
15 in the research teams. However, once adjusted for the degrees in the multivariate analyses, we  
16 confirmed that the roles in medical research were not the same between female and male  
17 authors. Another possibility is that women in science choose different career paths than men,  
18 and thus naturally take on different tasks (if so, why this should be the case would deserve  
19 exploration).<sup>17</sup> Finally, it is possible that the task differentiation reflects to some extent sexist  
20 attitudes that are prevalent in society – to caricature, women take care of various chores while  
21 men discuss lofty ideas in the smoking room. Some authors have argued that women may  
22 have a different self-perception of the tasks they should accomplish or not and may be less  
23 reluctant to perform administrative, technical or logistical tasks compared to their male  
24 counterparts.<sup>18</sup>

25  
26  
27  
28  
29  
30  
31  
32  
33  
34  
35  
36  
37  
38  
39  
40  
41  
42  
43  
44  
45  
46  
47  
48  
49  
50  
51 The author's position on the article byline depends on cumulative contributions and the  
52 type of tasks performed in the research project as well as seniority and responsibilities in the  
53 overall work.<sup>19</sup> We observed that women were less likely than men to be last authors

1  
2  
3 compared to middle author positions. In their study, Jagsi et al. reported an increase in the  
4  
5 proportion of women at last positions in scientific papers over a 30-year period.<sup>14</sup> As the  
6  
7 position on the article byline likely depends on contributions to specific tasks, we adjusted our  
8  
9 models on this variable and this masked the association between gender and senior author  
10  
11 position. This finding suggests that the contribution to specific roles in the research project is  
12  
13 key for achieving a prestigious position among authors.  
14  
15

16  
17 This study has strengths and limitations. The originality of our study relies on the  
18  
19 comparison of contributions reported in a standardized manner over a 15-year time span.  
20  
21 However, we included articles from a single US medical journal because of the standardized  
22  
23 description and constant report over this time span of author contributions at the end of each  
24  
25 original article. In other journals, such as those published by the PLoS, authors are free to  
26  
27 declare their contributions from a pre-established list with no standard report. However, this  
28  
29 study in a single journal may limit the generalisability of our findings. Second, the 10  
30  
31 contributions to research were self-reported and not verified by the study investigators. A  
32  
33 previous study suggested that descriptions of contributions may lack reliability because they  
34  
35 are frequently completed by the corresponding author of the paper.<sup>20</sup> Whether such errors may  
36  
37 have biased the comparison of female and male authors is unclear. Third, we cannot totally  
38  
39 exclude misclassification of some authors' gender. However, we used methods that were  
40  
41 previously reported and assessed and believe that such errors should be rare.<sup>14,15</sup> Finally, we  
42  
43 did not obtain information on the authors' age, past experience in research, professorial rank,  
44  
45 medical specialty and primary scientific discipline, which may all contribute to gender  
46  
47 differences in specific research roles (Figure 1). Therefore our ability to explain causes of  
48  
49 gender differences remains limited.  
50  
51  
52  
53

54 Our results highlight that research roles are not distributed equally between women and  
55  
56 men researchers and that these differences have remained unchanged over a 15-year period.  
57  
58  
59



1  
2  
3 This may be due to justifiable reasons, such as seniority, specific training and skills in  
4 research, or role preferences of the researchers. However, the possibility also exists that the  
5 academic research milieu perpetuates sexist attitudes and unequal treatment of researchers  
6 based solely on their gender. This issue requires further exploration, and justifies the  
7 continuation of local initiatives (such as gender equality commissions in universities, or  
8 mentoring programmes) that promote women's involvement in research and ensure fair career  
9 opportunities, regardless of gender.  
10  
11  
12  
13  
14  
15  
16  
17  
18  
19  
20  
21  
22  
23  
24  
25  
26  
27  
28  
29  
30  
31  
32  
33  
34  
35  
36  
37  
38  
39  
40  
41  
42  
43  
44  
45  
46  
47  
48  
49  
50  
51  
52  
53  
54  
55  
56  
57  
58  
59  
60

## Acknowledgements

The authors wish to thank Rosemary Sudan for editorial assistance of the final version of the manuscript.

For peer review only

1  
2  
3  
4  
5  
6  
7  
8  
9  
10  
11  
12  
13  
14  
15  
16  
17  
18  
19  
20  
21  
22  
23  
24  
25  
26  
27  
28  
29  
30  
31  
32  
33  
34  
35  
36  
37  
38  
39  
40  
41  
42  
43  
44  
45  
46  
47  
48  
49  
50  
51  
52  
53  
54  
55  
56  
57  
58  
59  
60

**Funding statement**

This research received no specific grant from any funding agency in the public, commercial or not-for-profit sectors.

For peer review only

1  
2  
3  
4  
5  
6 **Competing interest**  
7

8  
9 None.  
10  
11  
12  
13  
14  
15  
16  
17  
18  
19  
20  
21  
22  
23  
24  
25  
26  
27  
28  
29  
30  
31  
32  
33  
34  
35  
36  
37  
38  
39  
40  
41  
42  
43  
44  
45  
46  
47  
48  
49  
50  
51  
52  
53  
54  
55  
56  
57  
58  
59  
60

For peer review only

## Author contributions

**Angèle Gayet-Ageron** participated in the conception & design; analysis & interpretation of data and she performed the statistical analyses. She contributed to the provision of study materials, collection & assembly of data, and she also provided administrative, technical, or logistic support. She drafted the first version of the manuscript and participated to the critical revision of it for important intellectual content. She has approved final version of the article.

**Antoine Poncet** participated in the conception & design; analysis & interpretation of data. He contributed to the provision of study materials, collection & assembly of data and also to administrative, technical, or logistic support. He participated to the critical revision of the article for important intellectual content. He has approved final version of the article..

**Thomas Perneger** participated in the conception & design; analysis & interpretation of data. He contributed to the provision of study materials, collection & assembly of data and also to administrative, technical, or logistic support. He participated to the critical revision of the article for important intellectual content. He has approved final version of the article.

## Data sharing statement

No unrestricted data sharing at this time. Interested parties may contact the corresponding author to gain access to the dataset.

For peer review only

## References

- 1 Burton KR, Wong IK. A force to contend with: The gender gap closes in Canadian medical schools. *CMAJ*. 2004;170:1385-6.
- 2 Barzansky B, Etzel SI. Medical schools in the United States, 2006-2007. *JAMA*. 2007;298:1071-7.
- 3 Levinson W, Lurie N. When most doctors are women: what lies ahead? *Ann Intern Med*. 2004;141:471-4.
- 4 Phillips SP. The growing number of female physicians: meanings, values, and outcomes. *Isr J Health Policy Res*. 2013;2:47.
- 5 Ramakrishnan A, Sambuco D, Jagsi R. Women's participation in the medical profession: insights from experiences in Japan, Scandinavia, Russia, and Eastern Europe. *J Womens Health (Larchmt)*. 2014;23:927-34.
- 6 Lambert TW, Goldacre MJ, Turner G. Career choices of United Kingdom medical graduates of 1999 and 2000: questionnaire surveys. *BMJ*. 2003;326:194-5.
- 7 Moss-Racusin CA, Dovidio JF, Brescoll VL, Graham MJ, Handelsman J. Science faculty's subtle gender biases favor male students. *Proc Natl Acad Sci U S A*. 2012;109:16474-9. doi:10.1073/pnas.1211286109.
- 8 Sambujak D, Straus SE, Marusic A. Mentoring in academic medicine: a systematic review. *JAMA*. 2006;296:1103-1115.
- 9 Jagsi R, Motomura AR, Griffith KA, Rangarajan S, Ubel PA. Sex differences in attainment of independent funding by career development awardees. *Ann Intern Med*. 2009;151:804-811.
- 10 Malacuso B, Larivière V, Sugimoto T, Sugimoto CR. Is Science Built on the Shoulders of Women? A Study of Gender Differences in Contributorship. *Acad Med*. 2016;91:1136-1142

- 1  
2  
3 11 ADVANCE: Increasing the Participation and Advancement of Women in Academic  
4 Science and Engineering Careers (ADVANCE).  
5  
6  
7 [https://www.nsf.gov/funding/pgm\\_summ.jsp?pims\\_id=5383](https://www.nsf.gov/funding/pgm_summ.jsp?pims_id=5383). Accessed on May 9,  
8 2017.  
9  
10  
11 12 Perneger TV, Poncet A, Carpentier M, Agoritsas T, Combescure C, Gayet-Ageron A.  
12 Thinker, soldier, scribe: cross-sectional study of researchers' roles and author order in  
13 the *Annals of Internal Medicine*. *BMJ Open*. 2017;7:e013898.  
14  
15  
16 13 Handelsman J, Cantor N, Carnes M, Denton D, Fine E, Grosz B, et al. Careers in  
17 science. More women in Science. *Science*. 2005;309:1190-1.  
18  
19  
20 14 Jaggi R, Guancial EA, Worobey CC, Henault LE, Chang Y, Starr R, et al. The "gender  
21 gap" in authorship of academic medical literature--a 35-year perspective. *N Engl J*  
22 *Med*. 2006;355:281-7.  
23  
24  
25 15 Filardo G, da Graca B, Sass DM, Pollock BD, Smith EB, Martinez MAM. Trends and  
26 comparison of femal first authorship in high impact medical journals: observational  
27 study (1994-2014). *BMJ*. 2016;352:847-54.  
28  
29  
30 16 Amrein K, Langmann A, Fahrleitner-Pammer A, Pieber TR, Zollner-Schwetz I.  
31 Women underrepresented on editorial boards of 60 major medical journals. *Gend*  
32 *Med*. 2011;8:378-87.  
33  
34  
35 17 Sidhu R, Rajashekhar P, Lavin VL, Parry J, Attwood J, Holdcroft A, et al. The gender  
36 imbalance in academic medicine: a study of female authorship in the United Kingdom.  
37 *J R Soc Med*. 2009;102: 337-342  
38  
39  
40 18 Zbar A, Frank E. Significance of authorship position: an open-ended international  
41 assessment. *Am J Med Sci*. 2011;341:106-9.  
42  
43  
44 19 Rudman LA. Self-promotion as a risk factor for women: the costs and benefits of  
45 counterstereotypical impression management. *J Pers Soc Psychol*. 1998;74:629-45.  
46  
47  
48  
49  
50  
51  
52  
53  
54  
55  
56  
57  
58  
59  
60



1  
2  
3  
4  
5  
6  
7  
8  
9  
10  
11  
12  
13  
14  
15  
16  
17  
18  
19  
20  
21  
22  
23  
24  
25  
26  
27  
28  
29  
30  
31  
32  
33  
34  
35  
36  
37  
38  
39  
40  
41  
42  
43  
44  
45  
46  
47  
48  
49  
50  
51  
52  
53  
54  
55  
56  
57  
58  
59  
60

20 Ilakovac V, Fister K, Marusic M, Marusic A. Reliability of disclosure forms of authors' contributions. CMAJ. 2007;176:41-6.

For peer review only

## Figure legend

Figure 1. Possible mechanisms explaining gender bias in the authorship of scientific publications.

For peer review only

**Table 1. Comparison of author and study characteristics by gender, stratified by the year of publication.**

| Variables                                 | 2000                 |             | p-value | 2015                 |             | p-value | Change in gender differences over time (p-value <sup>a</sup> ) |
|-------------------------------------------|----------------------|-------------|---------|----------------------|-------------|---------|----------------------------------------------------------------|
|                                           | Women (n=243, 31.5%) | Men (n=528) |         | Women (n=469, 41.2%) | Men (n=670) |         |                                                                |
| Education, n (%)                          |                      |             | <0.001  |                      |             | <0.001  | 0.17                                                           |
| MD                                        | 92 (37.9)            | 343 (65.0)  |         | 120 (25.6)           | 291 (43.4)  |         |                                                                |
| MD and PhD                                | 12 (4.9)             | 56 (10.6)   |         | 18 (3.8)             | 88 (13.1)   |         |                                                                |
| MD and Master                             | 26 (10.7)            | 35 (6.6)    |         | 66 (14.1)            | 109 (16.3)  |         |                                                                |
| PhD                                       | 40 (16.5)            | 59 (11.2)   |         | 135 (28.8)           | 113 (16.9)  |         |                                                                |
| Master                                    | 30 (12.3)            | 24 (4.6)    |         | 85 (18.1)            | 50 (7.5)    |         |                                                                |
| Other degree or no degree                 | 43 (17.7)            | 11 (2.1)    |         | 45 (9.6)             | 19 (2.8)    |         |                                                                |
| Home institution, n (%)                   |                      |             | 0.37    |                      |             | 0.23    | 0.66                                                           |
| University                                | 66 (27.2)            | 110 (20.8)  |         | 151 (32.2)           | 192 (28.7)  |         |                                                                |
| Medical school or hospital                | 132 (54.3)           | 334 (63.3)  |         | 221 (47.1)           | 372 (55.5)  |         |                                                                |
| Public agency                             | 20 (8.2)             | 31 (5.9)    |         | 48 (10.2)            | 55 (8.2)    |         |                                                                |
| Industry                                  | 11 (4.5)             | 29 (5.5)    |         | 20 (4.3)             | 21 (3.1)    |         |                                                                |
| Foundation or other non-profit            | 8 (3.3)              | 10 (1.9)    |         | 21 (4.5)             | 19 (2.8)    |         |                                                                |
| Contract research organisation or similar | 5 (2.1)              | 10 (1.9)    |         | 6 (1.3)              | 5 (0.8)     |         |                                                                |
| Other                                     | 1 (0.4)              | 4 (0.8)     |         | 2 (0.4)              | 6 (0.9)     |         |                                                                |
| Country, n (%)                            |                      |             | 0.01    |                      |             | 0.06    | 0.52                                                           |
| USA                                       | 188 (77.4)           | 347 (65.7)  |         | 368 (78.5)           | 466 (69.6)  |         |                                                                |
| Canada                                    | 12 (4.9)             | 23 (4.4)    |         | 32 (6.8)             | 58 (8.7)    |         |                                                                |
| Europe                                    | 36 (14.8)            | 99 (18.8)   |         | 48 (10.2)            | 100 (14.9)  |         |                                                                |
| Other                                     | 7 (2.9)              | 59 (11.2)   |         | 21 (4.5)             | 46 (6.9)    |         |                                                                |

<sup>a</sup> P-value testing an interaction between each variable listed and the year in the assessment of gender differences.

**Table 2. Comparison of author contributions by gender, stratified by the year of publication.**

| Variables                                                           | 2000                 |             |         | 2015                 |             |         | Change in gender differences over time (p-value <sup>a</sup> ) |
|---------------------------------------------------------------------|----------------------|-------------|---------|----------------------|-------------|---------|----------------------------------------------------------------|
|                                                                     | Women (n=243, 31.5%) | Men (n=528) | p-value | Women (n=469, 41.2%) | Men (n=670) | p-value |                                                                |
| Contributions in the paper, n (%)                                   |                      |             |         |                      |             |         |                                                                |
| Conception and design                                               | 134 (55.1)           | 323 (61.2)  | 0.03    | 223 (47.6)           | 372 (55.5)  | 0.001   | 0.81                                                           |
| Analysis and interpretation of the data                             | 176 (72.4)           | 362 (68.6)  | 0.78    | 342 (72.9)           | 496 (74.0)  | 0.22    | 0.58                                                           |
| Drafting of the article                                             | 110 (45.3)           | 206 (39.0)  | 0.35    | 222 (47.3)           | 298 (44.5)  | 0.61    | 0.67                                                           |
| Critical revision of the article for important intellectual content | 171 (70.4)           | 426 (80.7)  | <0.001  | 317 (67.6)           | 535 (79.9)  | <0.001  | 0.94                                                           |
| Provision of materials/patients                                     | 106 (43.6)           | 244 (46.2)  | 0.75    | 98 (20.9)            | 178 (26.6)  | 0.05    | 0.29                                                           |
| Obtaining of funding                                                | 39 (16.1)            | 114 (21.6)  | 0.02    | 66 (14.1)            | 134 (20.0)  | <0.001  | 0.60                                                           |
| Statistical expertise                                               | 49 (20.2)            | 125 (23.7)  | 0.24    | 103 (22.0)           | 157 (23.4)  | 0.56    | 0.60                                                           |
| Administrative, technical and logistic support                      | 85 (35.0)            | 137 (26.0)  | 0.02    | 147 (31.3)           | 178 (26.6)  | 0.27    | 0.25                                                           |
| Collection and assembly of data                                     | 121 (49.8)           | 242 (45.8)  | 0.05    | 260 (55.4)           | 306 (45.7)  | 0.008   | 0.90                                                           |
| Final approval of the article                                       | 196 (80.7)           | 453 (85.8)  | 0.04    | 404 (86.1)           | 602 (89.9)  | 0.08    | 0.69                                                           |
| Author position, n (%)                                              |                      |             | 0.01    |                      |             | 0.003   | 0.84                                                           |
| First                                                               | 35 (14.4)            | 69 (13.1)   |         | 55 (11.7)            | 74 (11.0)   |         |                                                                |
| Second                                                              | 40 (16.5)            | 51 (9.7)    |         | 51 (10.9)            | 56 (8.4)    |         |                                                                |
| Middle                                                              | 117 (48.1)           | 256 (48.5)  |         | 290 (61.8)           | 377 (56.3)  |         |                                                                |
| Next-to-last                                                        | 29 (11.9)            | 70 (13.3)   |         | 40 (8.5)             | 77 (11.5)   |         |                                                                |
| Last                                                                | 22 (9.0)             | 82 (15.5)   |         | 33 (7.0)             | 86 (12.8)   |         |                                                                |

<sup>a</sup> P-value testing an interaction between each variable listed and the year in the assessment of gender differences. All p-values are obtained from mixed-effects logistic regression models.

1  
2  
3  
4  
5  
6  
7  
8  
9  
10  
11  
12  
13  
14  
15  
16  
17  
18  
19  
20  
21  
22  
23  
24  
25  
26  
27  
28  
29  
30  
31  
32  
33  
34  
35  
36  
37  
38  
39  
40  
41  
42  
43  
44  
45  
46  
47

**Table 3. Association between female gender and 10 contributions to a research paper by year, univariate (left columns) and multivariable models (right columns) after adjustment for academic degrees.**

| Contributions                                                       | Univariate analysis |           |         | Adjusted for degrees |           |         |
|---------------------------------------------------------------------|---------------------|-----------|---------|----------------------|-----------|---------|
|                                                                     | OR                  | 95% CI    | p-value | OR                   | 95% CI    | p-value |
| Conception and design                                               |                     |           |         |                      |           |         |
| 2000                                                                | 0.67                | 0.48-0.95 | 0.026   | 0.86                 | 0.60-1.24 | 0.42    |
| 2015                                                                | 0.64                | 0.49-0.84 | 0.001   | 0.76                 | 0.57-1.02 | 0.06    |
| Analysis and interpretation of data                                 |                     |           |         |                      |           |         |
| 2000                                                                | 0.95                | 0.64-1.39 | 0.78    | 0.99                 | 0.66-1.49 | 0.95    |
| 2015                                                                | 0.83                | 0.61-1.12 | 0.22    | 0.75                 | 0.54-1.04 | 0.09    |
| Drafting of the article                                             |                     |           |         |                      |           |         |
| 2000                                                                | 1.18                | 0.84-1.65 | 0.35    | 1.31                 | 0.92-1.86 | 0.14    |
| 2015                                                                | 1.07                | 0.82-1.39 | 0.61    | 1.16                 | 0.88-1.52 | 0.30    |
| Critical revision of the article for important intellectual content |                     |           |         |                      |           |         |
| 2000                                                                | 0.50                | 0.33-0.75 | <0.001  | 0.69                 | 0.45-1.06 | 0.09    |
| 2015                                                                | 0.51                | 0.38-0.70 | <0.001  | 0.64                 | 0.46-0.89 | 0.008   |
| Provision of materials/patients                                     |                     |           |         |                      |           |         |
| 2000                                                                | 0.94                | 0.64-1.37 | 0.75    | 1.57                 | 1.03-2.40 | 0.04    |
| 2015                                                                | 0.72                | 0.51-1.00 | 0.05    | 1.12                 | 0.78-1.62 | 0.54    |
| Statistical expertise                                               |                     |           |         |                      |           |         |
| 2000                                                                | 0.79                | 0.53-1.17 | 0.24    | 0.53                 | 0.34-0.82 | 0.005   |
| 2015                                                                | 0.91                | 0.68-1.23 | 0.56    | 0.59                 | 0.42-0.83 | 0.002   |
| Obtaining of funding                                                |                     |           |         |                      |           |         |
| 2000                                                                | 0.60                | 0.39-0.94 | 0.02    | 0.81                 | 0.51-1.28 | 0.36    |
| 2015                                                                | 0.52                | 0.36-0.74 | <0.001  | 0.62                 | 0.43-0.91 | 0.01    |
| Administrative, technical, and logistic support                     |                     |           |         |                      |           |         |
| 2000                                                                | 1.55                | 1.08-2.25 | 0.2     | 1.10                 | 0.74-1.63 | 0.63    |
| 2015                                                                | 1.18                | 0.88-1.58 | 0.26    | 1.01                 | 0.75-1.38 | 0.93    |
| Collection and assembly of data                                     |                     |           |         |                      |           |         |
| 2000                                                                | 1.42                | 0.99-2.03 | 0.05    | 1.13                 | 0.78-1.64 | 0.52    |
| 2015                                                                | 1.46                | 1.11-1.93 | 0.008   | 1.35                 | 1.01-1.81 | 0.04    |
| Final approval                                                      |                     |           |         |                      |           |         |
| 2000                                                                | 0.60                | 0.37-0.97 | 0.04    | 0.85                 | 0.51-1.41 | 0.52    |
| 2015                                                                | 0.69                | 0.45-1.04 | 0.08    | 0.92                 | 0.59-1.44 | 0.73    |

Abbreviations : OR : odds ratio ; 95% CI: 95% confidence interval

**Table 4. Association between female gender and position on the byline by year, in univariate analysis (left columns) and after adjustment for research contributions to the project (right columns).**

| Author position (vs. middle) <sup>a</sup> | Univariate analysis |           |         | Adjusted for contributions |           |         |
|-------------------------------------------|---------------------|-----------|---------|----------------------------|-----------|---------|
|                                           | OR                  | 95% CI    | p-value | OR                         | 95% CI    | p-value |
| First                                     |                     |           |         |                            |           |         |
| 2000                                      | 0.99                | 0.56-1.73 | 0.96    | 1.23                       | 0.35-4.33 | 0.74    |
| 2015                                      | 1.00                | 0.65-1.56 | 0.98    | 1.44                       | 0.69-3.01 | 0.33    |
| Second                                    |                     |           |         |                            |           |         |
| 2000                                      | 1.55                | 0.89-2.72 | 0.12    | 1.94                       | 1.05-3.59 | 0.03    |
| 2015                                      | 1.12                | 0.68-1.84 | 0.67    | 1.28                       | 0.75-2.21 | 0.37    |
| Next-to-last                              |                     |           |         |                            |           |         |
| 2000                                      | 0.63                | 0.34-1.17 | 0.14    | 0.73                       | 0.39-1.36 | 0.33    |
| 2015                                      | 0.58                | 0.36-0.93 | 0.02    | 0.59                       | 0.36-0.96 | 0.03    |
| Last                                      |                     |           |         |                            |           |         |
| 2000                                      | 0.55                | 0.30-1.01 | 0.05    | 0.80                       | 0.32-1.98 | 0.62    |
| 2015                                      | 0.46                | 0.28-0.75 | 0.002   | 0.71                       | 0.37-1.37 | 0.31    |

Abbreviations : OR : odds ratio ; 95% CI: 95% confidence interval

<sup>a</sup> 36 articles with four or less authors were excluded from the analyses.

1  
2  
3  
4  
5  
6  
7  
8  
9  
10  
11  
12  
13  
14  
15  
16  
17  
18  
19  
20  
21  
22  
23  
24  
25  
26  
27  
28  
29  
30  
31  
32  
33  
34  
35  
36  
37  
38  
39  
40  
41  
42  
43  
44  
45  
46  
47  
48  
49  
50  
51  
52  
53  
54  
55  
56  
57  
58  
59  
60

Figure 1. Possible mechanisms explaining gender bias in the authorship of scientific publications.

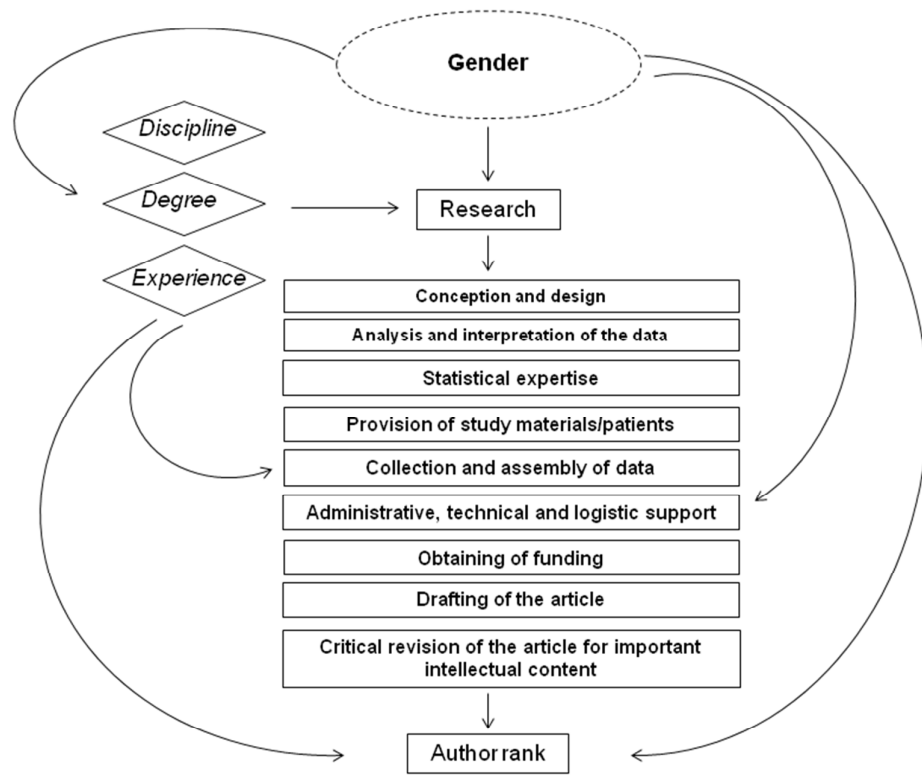

**STROBE 2007 (v4) Statement—Checklist of items that should be included in reports of *cross-sectional studies***

| Section/Topic                | Item # | Recommendation                                                                                                                                                                       | Reported on page # |
|------------------------------|--------|--------------------------------------------------------------------------------------------------------------------------------------------------------------------------------------|--------------------|
| Title and abstract           | 1      | (a) Indicate the study's design with a commonly used term in the title or the abstract                                                                                               | 1-2                |
|                              |        | (b) Provide in the abstract an informative and balanced summary of what was done and what was found                                                                                  | 2                  |
| <b>Introduction</b>          |        |                                                                                                                                                                                      |                    |
| Background/rationale         | 2      | Explain the scientific background and rationale for the investigation being reported                                                                                                 | 5-6                |
| Objectives                   | 3      | State specific objectives, including any prespecified hypotheses                                                                                                                     | 5                  |
| <b>Methods</b>               |        |                                                                                                                                                                                      |                    |
| Study design                 | 4      | Present key elements of study design early in the paper                                                                                                                              | 7                  |
| Setting                      | 5      | Describe the setting, locations, and relevant dates, including periods of recruitment, exposure, follow-up, and data collection                                                      | 7                  |
| Participants                 | 6      | (a) Give the eligibility criteria, and the sources and methods of selection of participants                                                                                          | 7                  |
| Variables                    | 7      | Clearly define all outcomes, exposures, predictors, potential confounders, and effect modifiers. Give diagnostic criteria, if applicable                                             | 7-8                |
| Data sources/<br>measurement | 8*     | For each variable of interest, give sources of data and details of methods of assessment (measurement). Describe comparability of assessment methods if there is more than one group | 7-8                |
| Bias                         | 9      | Describe any efforts to address potential sources of bias                                                                                                                            | 7                  |
| Study size                   | 10     | Explain how the study size was arrived at                                                                                                                                            | 8                  |
| Quantitative variables       | 11     | Explain how quantitative variables were handled in the analyses. If applicable, describe which groupings were chosen and why                                                         | NA                 |
| Statistical methods          | 12     | (a) Describe all statistical methods, including those used to control for confounding                                                                                                | 9-10               |
|                              |        | (b) Describe any methods used to examine subgroups and interactions                                                                                                                  | 9                  |
|                              |        | (c) Explain how missing data were addressed                                                                                                                                          | NA                 |
|                              |        | (d) If applicable, describe analytical methods taking account of sampling strategy                                                                                                   | NA                 |
|                              |        | (e) Describe any sensitivity analyses                                                                                                                                                | NA                 |
| <b>Results</b>               |        |                                                                                                                                                                                      |                    |



|                          |     |                                                                                                                                                                                                              |            |
|--------------------------|-----|--------------------------------------------------------------------------------------------------------------------------------------------------------------------------------------------------------------|------------|
| Participants             | 13* | (a) Report numbers of individuals at each stage of study—eg numbers potentially eligible, examined for eligibility, confirmed eligible, included in the study, completing follow-up, and analysed            | 10         |
|                          |     | (b) Give reasons for non-participation at each stage                                                                                                                                                         | NA         |
|                          |     | (c) Consider use of a flow diagram                                                                                                                                                                           | NA         |
| Descriptive data         | 14* | (a) Give characteristics of study participants (eg demographic, clinical, social) and information on exposures and potential confounders                                                                     | 10+Table 1 |
|                          |     | (b) Indicate number of participants with missing data for each variable of interest                                                                                                                          | NA         |
| Outcome data             | 15* | Report numbers of outcome events or summary measures                                                                                                                                                         | Table 2    |
| Main results             | 16  | (a) Give unadjusted estimates and, if applicable, confounder-adjusted estimates and their precision (eg, 95% confidence interval). Make clear which confounders were adjusted for and why they were included | Tables 3-4 |
|                          |     | (b) Report category boundaries when continuous variables were categorized                                                                                                                                    | NA         |
|                          |     | (c) If relevant, consider translating estimates of relative risk into absolute risk for a meaningful time period                                                                                             | NA         |
| Other analyses           | 17  | Report other analyses done—eg analyses of subgroups and interactions, and sensitivity analyses                                                                                                               | NA         |
| <b>Discussion</b>        |     |                                                                                                                                                                                                              |            |
| Key results              | 18  | Summarise key results with reference to study objectives                                                                                                                                                     | 11         |
| Limitations              | 19  | Discuss limitations of the study, taking into account sources of potential bias or imprecision. Discuss both direction and magnitude of any potential bias                                                   | 14         |
| Interpretation           | 20  | Give a cautious overall interpretation of results considering objectives, limitations, multiplicity of analyses, results from similar studies, and other relevant evidence                                   | 12-14      |
| Generalisability         | 21  | Discuss the generalisability (external validity) of the study results                                                                                                                                        | 14-15      |
| <b>Other information</b> |     |                                                                                                                                                                                                              |            |
| Funding                  | 22  | Give the source of funding and the role of the funders for the present study and, if applicable, for the original study on which the present article is based                                                | NA         |

\*Give information separately for cases and controls in case-control studies and, if applicable, for exposed and unexposed groups in cohort and cross-sectional studies.

**Note:** An Explanation and Elaboration article discusses each checklist item and gives methodological background and published examples of transparent reporting. The STROBE checklist is best used in conjunction with this article (freely available on the Web sites of PLoS Medicine at <http://www.plosmedicine.org/>, Annals of Internal Medicine at <http://www.annals.org/>, and Epidemiology at <http://www.epidem.com/>). Information on the STROBE Initiative is available at [www.strobe-statement.org](http://www.strobe-statement.org).

# BMJ Open

## Comparison of the contributions of female and male authors to medical research over a 15-year time span: a cross-sectional study

|                                 |                                                                                                                                                                                                                                                                                                                                                 |
|---------------------------------|-------------------------------------------------------------------------------------------------------------------------------------------------------------------------------------------------------------------------------------------------------------------------------------------------------------------------------------------------|
| Journal:                        | <i>BMJ Open</i>                                                                                                                                                                                                                                                                                                                                 |
| Manuscript ID                   | bmjopen-2018-024436.R1                                                                                                                                                                                                                                                                                                                          |
| Article Type:                   | Research                                                                                                                                                                                                                                                                                                                                        |
| Date Submitted by the Author:   | 25-Sep-2018                                                                                                                                                                                                                                                                                                                                     |
| Complete List of Authors:       | Gayet-Ageron, Angele; Hopitaux Universitaires de Geneve, Medical Directorate / Division of Clinical Epidemiology<br>Poncet, Antoine; Hopitaux Universitaires de Geneve, Medical Directorate / Division of Clinical Epidemiology<br>Perneger, Thomas; Hopitaux Universitaires de Geneve, Medical Directorate / Division of Clinical Epidemiology |
| <b>Primary Subject Heading</b>: | Sociology                                                                                                                                                                                                                                                                                                                                       |
| Secondary Subject Heading:      | Epidemiology, Medical publishing and peer review                                                                                                                                                                                                                                                                                                |
| Keywords:                       | Gender, Publication, Research, Authorship                                                                                                                                                                                                                                                                                                       |
|                                 |                                                                                                                                                                                                                                                                                                                                                 |

SCHOLARONE™  
Manuscripts

1  
2  
3 **Comparison of the contributions of female and male authors to medical**  
4  
5 **research over a 15-year time span: a cross-sectional study**  
6  
7

8 Angèle Gayet-Ageron, MD, PhD<sup>1</sup>, Antoine Poncet, MS<sup>2</sup>, Thomas V Perneger, MD, PhD<sup>3</sup>  
9  
10

11  
12  
13  
14 <sup>1</sup> Senior physician, Division of Clinical Epidemiology, University Hospitals of Geneva and,  
15 Faculty of Medicine, Geneva, Switzerland  
16

17  
18  
19 <sup>2</sup> Statistician, Division of Clinical Epidemiology, University Hospitals of Geneva and, Faculty  
20 of Medicine, Geneva, Switzerland  
21

22  
23  
24 <sup>3</sup> Head, Division of Clinical Epidemiology, University Hospitals of Geneva and, Faculty of  
25 Medicine, Geneva, Switzerland  
26  
27  
28

29  
30  
31  
32 **Keywords:** Gender; Publications ; Research ; Authorship.  
33

34  
35 **Word count:** 2856.  
36  
37  
38  
39  
40

41 Corresponding author: Angèle Gayet-Ageron, MD, PhD, Division of Clinical Epidemiology,  
42 University Hospitals of Geneva, 6 Rue Gabrielle Perret-Gentil, 1211 Geneva 14, Switzerland.  
43  
44 Tel.: +41 22 372 9027; fax: +41 22 372 9035. Email: [angele.gayet-ageron@hcuge.ch](mailto:angele.gayet-ageron@hcuge.ch)  
45  
46  
47  
48  
49  
50  
51  
52  
53  
54  
55  
56  
57  
58  
59  
60

## Abstract

**Objectives:** The proportion of women engaged in clinical research has increased over time. However, it is unclear if women and men contribute to the same extent during the conduct of research and, if so, if they are equally rewarded by a strategic first or last author position. We aim to describe the prevalence of women authors of original articles published over a 15-year interval and to compare the research contributions and author positions according to gender.

**Design:** Repeated cross-sectional study.

**Setting:** Published original articles.

**Participants:** 1910 authors of 223 original articles published in the *Annals of Internal Medicine* in 2000 and 2015.

**Primary and secondary outcomes measures:** Self-reported contributions to 10 aspects of the article (primary) and author position on the byline.

**Results:** The proportion of women authors increased from 32% (n=243) to 41% (n=469) between 2000 and 2015 ( $p<0.0001$ ). In 2000, women authors were less frequently involved than men in the conception and design (134 [55%] vs. 323 [61%];  $p=0.0256$ ), critical revision (171 [70%] vs. 426 [81%];  $p=0.0009$ ), final approval (196 [81%] vs. 453 [86%];  $p=0.0381$ ), and obtaining of funding (39 [16%] vs. 114 [22%];  $p=0.0245$ ). Women were more frequently involved than men in administration and logistics (85 [35%] vs. 137 [26%];  $p=0.0188$ ) and data collection (121 [50%] vs. 242 [46%];  $p=0.0532$ ), but they were similarly involved in the analysis and interpretation of data, drafting of the manuscript, provision of materials/patients, and statistical expertise. Women were less often last authors than men (22 [9%] vs. 82 [16%];  $p=0.0102$ ). These gender differences persisted in 2015.

1  
2  
3  
4  
5  
6  
7  
8  
9  
10  
11  
12  
13  
14  
15  
16  
17  
18  
19  
20  
21  
22  
23  
24  
25  
26  
27  
28  
29  
30  
31  
32  
33  
34  
35  
36  
37  
38  
39  
40  
41  
42  
43  
44  
45  
46  
47  
48  
49  
50  
51  
52  
53  
54  
55  
56  
57  
58  
59  
60

**Conclusions:** The representation of women among authors of medical articles increased notably between 2000 and 2015, but still remained below 50%. Women’s roles differed from those of men with no change over time.

For peer review only

## Article summary

### Strengths and limitations of this study

- We used all original articles and reviews published in 2000 and 2015 in a single, widely-cited USA-based medical journal that provides a constant and standard format for reporting author contributions.
- We assessed 10 self-reported contributions of all authors of the selected original articles papers by gender over a 15-year period.
- We compared the authors' position on the byline by gender over a 15-year period after adjustment for their self-reported contributions.
- We did not obtain information on the authors' age, past experience in research, professorial rank, medical specialty and primary scientific discipline, which may all contribute to gender differences in specific research roles and this may decrease the interpretation of findings.

## Introduction

Over the past decades, the proportion of women in medical sciences has increased worldwide.<sup>1-5</sup> This demographic change should be associated in theory with a higher representation of women authoring scientific publications.<sup>6</sup> In principle, women should make equivalent contributions to research and have the same opportunity to lead research projects as men. Furthermore, we should observe increased numbers of women at academic leadership positions.<sup>5</sup> However, the chances of succeeding in research and obtaining a senior position are not the same for men and women with similar competencies.<sup>7</sup> Women face also more difficulties than men in finding a mentor to help them manage their careers and facilitate their advancement, and productivity.<sup>7,8</sup> Finally, women scientists are less likely than men to get funded or to coauthor scientific publications.<sup>9</sup> A recent publication demonstrated that the contribution differed between female and male authors of articles published in journals from the Public Library of Science (PLOS).<sup>10</sup>

Currently, we do not fully understand how gender differences in indicators of academic achievement occur. One possibility is that men and women researchers do essentially the same things, but are not rewarded equitably by grants, author roles or tenured positions. Alternatively, the roles of men and women researchers may be different due to different trajectories during their training, in which case the unequal rewards would be merely a consequence of these different skills and contributions (Figure 1). It is important to understand this, because remedial actions would not be the same for these two types of gender inequality. Many universities have implemented programmes to facilitate women's careers in science in the past decades.<sup>9,11</sup> The effectiveness of such programmes is usually assessed through the gender ratio of academic promotions. However, promotions reflect only a late outcome and we know little about changes in gender roles during the conduct of research.

1  
2  
3 To clarify these issues, we conducted a cross-sectional study of original articles  
4 published in the *Annals of Internal Medicine* 15 years apart. We selected this journal because  
5 it applies a standardized description of 10 possible roles of all authors and this description has  
6 remained stable over this time span. Our main objective was to compare the scientific  
7 contributions to medical research of female and male authors at both time periods and to  
8 determine if gender differences that may have been present in 2000 have narrowed or  
9 disappeared by 2015. Our secondary objective was to compare the authorship position of  
10 female and male authors with similar contributions to the research project and again to assess  
11 if there was a change between 2000 and 2015.  
12  
13  
14  
15  
16  
17  
18  
19  
20  
21  
22  
23  
24  
25  
26  
27  
28  
29  
30  
31  
32  
33  
34  
35  
36  
37  
38  
39  
40  
41  
42  
43  
44  
45  
46  
47  
48  
49  
50  
51  
52  
53  
54  
55  
56  
57  
58  
59  
60



## Methods

As the study was only based on a review of data publicly available online, prior approval from our institutional review board was not required for this study.

### Study design and population

We conducted a cross-sectional study of all original reports and reviews published in the *Annals of Internal Medicine* in two time periods: 1) from 1 January, 2000 to 31 December, 2000 and 2) from 1 January, 2015 to 31 December, 2015. Consensus statements, guidelines, clinical case reports and opinion papers were excluded because the author contributions criteria list does not fully fit these papers. All authors of the original research papers were included in the study population.

### Study variables

The main independent variables were the time period and author gender. We determined the gender of each author from their first names. If an author's gender was unclear to us, we used an internet search to find photographs and/or bibliographical information on the author. If this search was unproductive, we looked up the common usage of the first name.

The main dependent variables were the 10 possible contributions to the research paper as published in the *Annals*: 1) conception and design; 2) analysis and interpretation of the data; 3) drafting of the article; 4) critical revision of article for important intellectual content; 5) final approval of the article; 6) provision of study materials or patients; 7) statistical expertise; 8) obtaining of funding; 9) administrative, technical or logistic support; and 10) collection and assembly of data. We also retrieved the author's rank on the byline in five categories: first, second, middle, next-to-last and last positions. If there were four authors, the

1  
2  
3 middle author position was omitted; if there were three authors, the next-to-last position was  
4  
5 also omitted; when there were two authors, the second position was omitted. In the case of a  
6  
7 joint first author, the second position was not considered. We compared the first, second,  
8  
9 next-to-last, and last positions to the middle rank.  
10

11  
12 Other variables collected at the author level were: degrees (MD or other medical degree  
13  
14 such as MBBS or DO, with or without an additional Master's degree or PhD; any PhD or  
15  
16 other doctoral degree alone, such as ScD or JD; any Master's degree alone), home institution  
17  
18 (university, including public health schools; medical school or hospital; public agency;  
19  
20 industry; foundation or other non-profit; contract research organisation or consulting firm,  
21  
22 including individuals who gave only a street address), country/continent of affiliation (USA,  
23  
24 Canada, Europe, and other). Independent variables at the article level was the type of funding  
25  
26 (industry funding and specific non-industry funding), and subject matter (disease,  
27  
28 prevention/behavior/education, and research methods/medico-economics/work environment).  
29  
30 For each article, variables were collected from the online publication by one of the  
31  
32 investigators (AGA, AP or TP) following pre-specified rules. Uncertainties were solved by  
33  
34 discussion and consensus between investigators.  
35  
36  
37  
38  
39  
40  
41

### 42 **Sample size estimation**

43  
44 An initial analysis of authorship profiles used all papers published in 2015.<sup>12</sup> For this analysis  
45  
46 of time trends and gender, we added all papers published in 2000. The study had a >90%  
47  
48 power to detect a difference in the prevalence of female authors of 10% (e.g., 40% vs. 50%),  
49  
50 even in the presence of a design effect of 2 due to intra-article correlation of author gender.  
51  
52  
53  
54  
55  
56  
57  
58  
59  
60

## Statistical analysis

We described data at the author level and at the article level. We presented the author characteristic, contribution to publication and position on the byline by gender and by year of publication (2000 and 2015). First, we tested if the proportion of women varied between 2000 and 2015 by means of a mixed-effects logistic regression model with author gender as the dependent variable, a random effect at the article level, and fixed effect on the year of publication. Then we assessed if every author characteristic (degree, home institution, country/continent of affiliation) was associated with gender using three mixed-effects models as previously described (adding a fixed-effect on the author characteristic) and if each of these associations remained stable over time by including an interaction term between the year and the author characteristic. We compared the proportion of each subject matter between the two years using Chi-2 test.

We assessed the association and its evolution over time between gender and 10 specific contributions to research paper. We built 10 mixed-effects logistic regression models where the contribution was the dependent variable, the article was the random factor, and gender was the main fixed factor. In each model, we included the year and an interaction term between the year and gender to assess change over time. Finally, we reassessed these associations after adjustment for academic degrees. We reported both univariate and multivariable odds ratios (ORs) and 95% confidence intervals (95% CI) by the year of publication.

Finally, to identify if gender was associated with a specific position on the article byline, we performed four conditional logistic regression models where each article defined a cluster, with author position (e.g. first vs. middle rank) as the dependent variable and gender the main predictor. We included the year and an interaction term between the year and gender

1  
2  
3 to assess if there was a change over time of the associations between gender and author  
4  
5 position. Then we adjusted the models for the 10 authors' contributions to research. We built  
6  
7 four models, comparing the first, second, next-to-last and last position to middle position. In  
8  
9 these models, articles with four or fewer authors were excluded from the analyses.  
10

11  
12 All analyses were performed using STATA version IC 15 for Windows (STATA Corp.,  
13  
14 College Station, Texas,). Statistical significance was defined as  $p < 0.05$  (two-sided).  
15  
16  
17  
18  
19

## 20 **Patient and public involvement**

21  
22  
23 Our study was an investigator-oriented research. Consequently, patients were not involved in  
24  
25 the development of the research question and outcome measures, nor in the study design, data  
26  
27 collection and conduct of the study. Therefore, we did not attempt to disseminate the results to  
28  
29 study participants as the study was based on publicly available data extracted from published  
30  
31 articles. However, these results were presented and discussed at an academic level in a Swiss  
32  
33 colloquium in internal medicine (SGAIM SSMIG SSGIM 1 June 2018, Basel, Switzerland)  
34  
35 and at the European Congress of Epidemiology 2018 (Lyon, France).  
36  
37  
38  
39  
40  
41

## 42 **Results**

43  
44  
45 We included 223 research papers published in the *Annals of Internal Medicine*; 104 articles in  
46  
47 2000 and 119 in 2015 (53%). In total, 1910 authors were listed on the 223 papers; 771 in 2000  
48  
49 and 1139 in 2015 (60%). The average number of authors per article was 7.4 (standard  
50  
51 deviation [SD] 4.3; range 2-30) in 2000 and 9.6 (SD 5.4; range 2-29) in 2015. Thirty-six  
52  
53 articles included four or fewer authors. The distribution of each subject matter did not vary  
54  
55 between 2000 and 2015: articles related to diseases represented 83.7% of all articles in 2000  
56  
57  
58  
59  
60

1  
2  
3 (n=87) compared with 80.7% in 2015 (n=96); articles related to prevention, behaviors or  
4 education represented 9.6% in 2000 (n=10) vs. 7.6% in 2015 (n=9); articles related to  
5 research methods, work environment or medico-economic analyses represented 6.7% in 2000  
6  
7 (n=7) vs. 11.8% in 2015 (n=14) (p=0.401).  
8  
9  
10

### 11 12 13 14 15 **Comparison of characteristics, contributions to research and position on the byline by** 16 17 **gender in 2000 and 2015** 18

19  
20 The proportion of women among authors increased by 10% between 2000 and 2015 (243  
21 [32%] vs. 469 [41%]; p<0.0001; Table 1). At the paper level, one article was written only by  
22 women authors in 2000 (1%) vs. three articles in 2015 (3%); 17 articles were written only by  
23 men authors in 2000 (16%) vs. 12 articles in 2015 (10%), and 86 articles had mixed women  
24 and men authors in 2000 (83%) vs. 104 in 2015 (87%). In both years, women had an MD  
25 and/or PhD degree less frequently compared to men (Table 1). Women did not differ from  
26 men regarding their home institution in both years. There were some minor differences in the  
27 country of affiliation between women and men. We did not find any change over time in the  
28 proportions of women and men by author characteristic (p>0.05 for all interaction tests).  
29  
30  
31  
32  
33  
34  
35  
36  
37  
38  
39  
40  
41  
42  
43  
44  
45

### 46 47 48 49 50 51 52 53 54 55 56 57 58 59 60

### **Association between gender and contributions to research**

Women were less likely than men to contribute to the conception and design, critical revision of the article for important intellectual content, final approval of the article, and obtaining of funding, both in 2000 and 2015 (Table 2). In contrast, women contributed more frequently than men to administrative, technical or logistic support and to the collection and assembly of data both in 2000 and 2015. We did not find any statistical interactions between gender and

1  
2  
3 year of publication for each of the 10 contributions, i.e., no evidence of gender roles changing  
4  
5 over time. After adjustment for academic degrees (Table 3), most gender differences were  
6  
7 attenuated, which indicates that training explains part of the gender-related differences, except  
8  
9 for statistical expertise. However, this adjustment showed also that women contributed  
10  
11 significantly less to statistical expertise than men in 2000 and 2015.  
12  
13  
14  
15  
16

### 17 **Association between gender and author position on the byline**

18  
19  
20 Women were more frequently in second position and less frequently in last position compared  
21  
22 to men (Table 2). Gender differences in author rank did not change over time. After  
23  
24 adjustment for author contributions (Table 4), the gender difference in last author positions  
25  
26 disappeared in both years. Furthermore, women appeared to be more likely to be listed second  
27  
28 on the byline (significantly so in 2000) and less likely to be next-to-last (significantly so in  
29  
30 2015).  
31  
32  
33  
34  
35  
36  
37  
38  
39  
40  
41  
42  
43  
44  
45  
46  
47  
48  
49  
50  
51  
52  
53  
54  
55  
56  
57  
58  
59  
60

## Discussion

Our main finding is that the contributions to research of women and men authors differ considerably and that these gender roles have remained essentially unchanged between the years 2000 and 2015. At both time periods, women participated less frequently than men in study conception and design, statistical expertise, critical revision of the article, and obtaining of funding, but contributed more frequently to collection and assembly of data and to administrative, technical and logistic support. Regarding their place on the article byline, women were less likely to be last authors compared to men, again at both time periods. Nevertheless, the proportion of female authors has increased by 10% between 2000 and 2015. While this reflects progress toward equal gender representation in research, the proportion of women is still well below 50%.

Our study confirmed the trend toward a better representation of women in scientific publications. Underrepresentation of women in science and in medical fields in particular has been a constant finding over the past several decades.<sup>13</sup> This has prompted the launch of national programmes to improve the participation and advancement of women in academic careers.<sup>11</sup> The recent increase of female authors in scientific publications may be attributed to these initiatives. Similar to our study, Jagsi et al. reported an increase of women with a MD degree among the first and senior authors in six major journals between 1970 and 2004, including the *Annals of Internal Medicine*.<sup>14</sup> Filardo et al. described an increase from 28% in 1994 to 38% in 2014 in the proportion of female first authors in six prominent medical journals, also including the *Annals of Internal Medicine*.<sup>15</sup> Improvement in the representation of female first authors was the highest in Europe over the last four decades compared to other regions.<sup>16</sup> However, the proportions of female authors reported in scientific publications in the 2000s have remained below 50%. This may be due to women's preference for clinical and

1  
2  
3 teaching duties over research.<sup>17</sup> However, even if this were the case, why women would make  
4  
5 such choices is an intriguing question.  
6  
7

8         An important finding of our study is the gender gap in research roles as captured by  
9  
10 author contributions. This confirms the results of Macaluso et al. who showed that female  
11  
12 authors in the PLoS journals were significantly less likely to be associated with analysis,  
13  
14 design, contributing materials or writing of the paper compared to male authors, but that  
15  
16 women were more likely to be associated with experimentation.<sup>10</sup> We propose here some  
17  
18 possible explanations. First, women researchers may be on average younger and less  
19  
20 experienced than men. As the increase in the proportion of women in medical sciences is  
21  
22 recent, it may be years before women acquire the competencies and acquire the independence  
23  
24 leading to more credit and accountability of their research. However, the differences between  
25  
26 women and men authors have hardly changed between 2000 and 2015 as we would expect if  
27  
28 it was merely a question of catching up. We noted that a larger proportion of female authors  
29  
30 had non-terminal degrees and this might explain the higher proportion of non-leadership roles  
31  
32 in the research teams. However, once adjusted for the degrees and research topic in the  
33  
34 multivariate analyses, we confirmed that the roles in medical research were not the same  
35  
36 between female and male authors. Another possibility is that women in science choose  
37  
38 different career paths than men, and thus naturally take on different tasks (if so, why this  
39  
40 should be the case would deserve exploration).<sup>18</sup> Finally, it is possible that the task  
41  
42 differentiation reflects to some extent sexist attitudes that are prevalent in society – to  
43  
44 caricature, women take care of various chores while men discuss lofty ideas in the smoking  
45  
46 room. Some authors have argued that women may have a different self-perception of the tasks  
47  
48 they should accomplish or not and may be less reluctant to perform administrative, technical  
49  
50 or logistical tasks compared to their male counterparts.<sup>19</sup>  
51  
52  
53  
54  
55  
56  
57  
58  
59  
60



1  
2  
3 The author's position on the article byline depends on cumulative contributions and the  
4 type of tasks performed in the research project as well as seniority and responsibilities in the  
5 overall work.<sup>20</sup> We observed that women were less likely than men to be last authors  
6 compared to middle author positions. In their study, Jagsi et al. reported an increase in the  
7 proportion of women at last positions in scientific papers over a 30-year period.<sup>14</sup> As the  
8 position on the article byline likely depends on contributions to specific tasks, we adjusted our  
9 models on this variable and this masked the association between gender and senior author  
10 position. This finding suggests that the contribution to specific roles in the research project is  
11 key for achieving a prestigious position among authors.  
12  
13  
14  
15  
16  
17  
18  
19  
20  
21  
22

23 This study has strengths and limitations. The originality of our study relies on the  
24 comparison of contributions reported in a standardized manner over a 15-year time span.  
25 However, we included articles from a single US medical journal because of the standardized  
26 description and constant report over this time span of author contributions at the end of each  
27 original article. In other journals, such as those published by the PLoS, authors are free to  
28 declare their contributions from a pre-established list with no standard report. However, this  
29 study in a single journal may limit the generalisability of our findings. Second, the 10  
30 contributions to research were self-reported and not verified by the study investigators. A  
31 previous study suggested that descriptions of contributions may lack reliability because they  
32 are frequently completed by the corresponding author of the paper.<sup>21</sup> Whether such errors may  
33 have biased the comparison of female and male authors is unclear. Third, we cannot totally  
34 exclude misclassification of some authors' gender. However, we used methods that were  
35 previously reported and assessed and believe that such errors should be rare.<sup>14,15</sup> Finally, we  
36 did not obtain information on the authors' age, past experience in research, professorial rank,  
37 medical specialty and primary scientific discipline, which may all contribute to gender  
38  
39  
40  
41  
42  
43  
44  
45  
46  
47  
48  
49  
50  
51  
52  
53  
54  
55  
56  
57  
58  
59  
60

1  
2  
3 differences in specific research roles (Figure 1). Therefore our ability to explain causes of  
4  
5 gender differences remains limited.  
6  
7

8           Our results highlight that research roles are not distributed equally between women and  
9  
10 men researchers and that these differences have remained unchanged over a 15-year period.  
11  
12 This may be due to justifiable reasons, such as seniority, specific training and skills in  
13  
14 research, or role preferences of the researchers. However, the possibility also exists that the  
15  
16 academic research milieu perpetuates sexist attitudes and unequal treatment of researchers  
17  
18 based solely on their gender. This issue requires further exploration, and justifies the  
19  
20 continuation of local initiatives (such as gender equality commissions in universities, or  
21  
22 mentoring programmes) that promote women's involvement in research and ensure fair career  
23  
24 opportunities, regardless of gender.  
25  
26  
27  
28  
29  
30  
31  
32  
33  
34  
35  
36  
37  
38  
39  
40  
41  
42  
43  
44  
45  
46  
47  
48  
49  
50  
51  
52  
53  
54  
55  
56  
57  
58  
59  
60

1  
2  
3  
4  
5  
6  
7  
8  
9  
10  
11  
12  
13  
14  
15  
16  
17  
18  
19  
20  
21  
22  
23  
24  
25  
26  
27  
28  
29  
30  
31  
32  
33  
34  
35  
36  
37  
38  
39  
40  
41  
42  
43  
44  
45  
46  
47  
48  
49  
50  
51  
52  
53  
54  
55  
56  
57  
58  
59  
60

## Acknowledgements

The authors wish to thank Rosemary Sudan for editorial assistance of the final version of the manuscript.

For peer review only

## Funding statement

This research received no specific grant from any funding agency in the public, commercial or not-for-profit sectors.

For peer review only

1  
2  
3  
4  
5  
6  
7  
8  
9  
10  
11  
12  
13  
14  
15  
16  
17  
18  
19  
20  
21  
22  
23  
24  
25  
26  
27  
28  
29  
30  
31  
32  
33  
34  
35  
36  
37  
38  
39  
40  
41  
42  
43  
44  
45  
46  
47  
48  
49  
50  
51  
52  
53  
54  
55  
56  
57  
58  
59  
60

**Competing interest**

None.

For peer review only

## Author contributions

**Angèle Gayet-Ageron** participated in the conception & design; analysis & interpretation of data and she performed the statistical analyses. She contributed to the provision of study materials, collection & assembly of data, and she also provided administrative, technical, or logistic support. She drafted the first version of the manuscript and participated to the critical revision of it for important intellectual content. She has approved final version of the article.

**Antoine Poncet** participated in the conception & design; analysis & interpretation of data. He contributed to the provision of study materials, collection & assembly of data and also to administrative, technical, or logistic support. He participated to the critical revision of the article for important intellectual content. He has approved final version of the article..

**Thomas Perneger** participated in the conception & design; analysis & interpretation of data. He contributed to the provision of study materials, collection & assembly of data and also to administrative, technical, or logistic support. He participated to the critical revision of the article for important intellectual content. He has approved final version of the article.

1  
2  
3  
4  
5  
6  
7  
8  
9  
10  
11  
12  
13  
14  
15  
16  
17  
18  
19  
20  
21  
22  
23  
24  
25  
26  
27  
28  
29  
30  
31  
32  
33  
34  
35  
36  
37  
38  
39  
40  
41  
42  
43  
44  
45  
46  
47  
48  
49  
50  
51  
52  
53  
54  
55  
56  
57  
58  
59  
60

**Data sharing statement**

No unrestricted data sharing at this time. Interested parties may contact the corresponding author to gain access to the dataset.

For peer review only

## References

- 1 Burton KR, Wong IK. A force to contend with: The gender gap closes in Canadian medical schools. *CMAJ*. 2004;170:1385-6.
- 2 Barzansky B, Etzel SI. Medical schools in the United States, 2006-2007. *JAMA*. 2007;298:1071-7.
- 3 Levinson W, Lurie N. When most doctors are women: what lies ahead? *Ann Intern Med*. 2004;141:471-4.
- 4 Phillips SP. The growing number of female physicians: meanings, values, and outcomes. *Isr J Health Policy Res*. 2013;2:47.
- 5 Ramakrishnan A, Sambuco D, Jagsi R. Women's participation in the medical profession: insights from experiences in Japan, Scandinavia, Russia, and Eastern Europe. *J Womens Health (Larchmt)*. 2014;23:927-34.
- 6 Lambert TW, Goldacre MJ, Turner G. Career choices of United Kingdom medical graduates of 1999 and 2000: questionnaire surveys. *BMJ*. 2003;326:194-5.
- 7 Moss-Racusin CA, Dovidio JF, Brescoll VL, Graham MJ, Handelsman J. Science faculty's subtle gender biases favor male students. *Proc Natl Acad Sci U S A*. 2012;109:16474-9. doi:10.1073/pnas.1211286109.
- 8 Sambujak D, Straus SE, Marusic A. Mentoring in academic medicine: a systematic review. *JAMA*. 2006;296:1103-1115.
- 9 Jagsi R, Motomura AR, Griffith KA, Rangarajan S, Ubel PA. Sex differences in attainment of independent funding by career development awardees. *Ann Intern Med*. 2009;151:804-811.
- 10 Malacuso B, Larivière V, Sugimoto T, Sugimoto CR. Is Science Built on the Shoulders of Women? A Study of Gender Differences in Contributorship. *Acad Med*. 2016;91:1136-1142



- 1  
2  
3 11 ADVANCE: Increasing the Participation and Advancement of Women in Academic  
4 Science and Engineering Careers (ADVANCE).  
5  
6  
7 [https://www.nsf.gov/funding/pgm\\_summ.jsp?pims\\_id=5383](https://www.nsf.gov/funding/pgm_summ.jsp?pims_id=5383). Accessed on May 9,  
8 2017.  
9  
10  
11 12 Perneger TV, Poncet A, Carpentier M, Agoritsas T, Combescure C, Gayet-Ageron A.  
12 Thinker, soldier, scribe: cross-sectional study of researchers' roles and author order in  
13 the Annals of Internal Medicine. *BMJ Open*. 2017;7:e013898.  
14  
15  
16 13 Handelsman J, Cantor N, Carnes M, Denton D, Fine E, Grosz B, et al. Careers in  
17 science. More women in Science. *Science*. 2005;309:1190-1.  
18  
19  
20 14 Jagsi R, Guancial EA, Worobey CC, Henault LE, Chang Y, Starr R, et al. The "gender  
21 gap" in authorship of academic medical literature--a 35-year perspective. *N Engl J*  
22 *Med*. 2006;355:281-7.  
23  
24  
25 15 Filardo G, da Graca B, Sass DM, Pollock BD, Smith EB, Martinez MAM. Trends and  
26 comparison of femal first authorship in high impact medical journals: observational  
27 study (1994-2014). *BMJ*. 2016;352:847-54.  
28  
29  
30 16 Wininger AE, Fischer JP, Likine EF, Gudeman AS, Brinker AR, Ryu J, et al.  
31 Bibliometric Analysis of Female Authorship Trends and Collaboration Dynamics  
32 Over JBMR's 30-Year History. *J Bone Miner Res*. 2017;32:2405-14.  
33  
34  
35 17 Amrein K, Langmann A, Fahrleitner-Pammer A, Pieber TR, Zollner-Schwetz I.  
36 Women underrepresented on editorial boards of 60 major medical journals. *Gend*  
37 *Med*. 2011;8:378-87.  
38  
39  
40 18 Sidhu R, Rajashekhar P, Lavin VL, Parry J, Attwood J, Holdcroft A, et al. The gender  
41 imbalance in academic medicine: a study of female authorship in the United Kingdom.  
42 *J R Soc Med*. 2009;102: 337-342  
43  
44  
45  
46  
47  
48  
49  
50  
51  
52  
53  
54  
55  
56  
57  
58  
59  
60

- 1  
2  
3 19 Zbar A, Frank E. Significance of authorship position: an open-ended international  
4 assessment. *Am J Med Sci*. 2011;341:106-9.  
5  
6  
7 20 Rudman LA. Self-promotion as a risk factor for women: the costs and benefits of  
8 counterstereotypical impression management. *J Pers Soc Psychol*. 1998;74:629-45.  
9  
10  
11 21 Ilakovac V, Fister K, Marusic M, Marusic A. Reliability of disclosure forms of  
12 authors' contributions. *CMAJ*. 2007;176:41-6.  
13  
14  
15  
16  
17  
18  
19  
20  
21  
22  
23  
24  
25  
26  
27  
28  
29  
30  
31  
32  
33  
34  
35  
36  
37  
38  
39  
40  
41  
42  
43  
44  
45  
46  
47  
48  
49  
50  
51  
52  
53  
54  
55  
56  
57  
58  
59  
60

For peer review only

1  
2  
3  
4  
5  
6  
7  
8  
9  
10  
11  
12  
13  
14  
15  
16  
17  
18  
19  
20  
21  
22  
23  
24  
25  
26  
27  
28  
29  
30  
31  
32  
33  
34  
35  
36  
37  
38  
39  
40  
41  
42  
43  
44  
45  
46  
47  
48  
49  
50  
51  
52  
53  
54  
55  
56  
57  
58  
59  
60

### Figure legend

Figure 1. Possible mechanisms explaining gender bias in the authorship of scientific publications.

For peer review only

**Table 1. Comparison of author and study characteristics by gender, stratified by the year of publication.**

| Variables                                 | 2000                 |             | p-value | 2015                 |             | p-value | Change in gender differences over time (p-value <sup>a</sup> ) |
|-------------------------------------------|----------------------|-------------|---------|----------------------|-------------|---------|----------------------------------------------------------------|
|                                           | Women (n=243, 31.5%) | Men (n=528) |         | Women (n=469, 41.2%) | Men (n=670) |         |                                                                |
| Education, n (%)                          |                      |             | <0.001  |                      |             | <0.001  | 0.17                                                           |
| MD                                        | 92 (37.9)            | 343 (65.0)  |         | 120 (25.6)           | 291 (43.4)  |         |                                                                |
| MD and PhD                                | 12 (4.9)             | 56 (10.6)   |         | 18 (3.8)             | 88 (13.1)   |         |                                                                |
| MD and Master                             | 26 (10.7)            | 35 (6.6)    |         | 66 (14.1)            | 109 (16.3)  |         |                                                                |
| PhD                                       | 40 (16.5)            | 59 (11.2)   |         | 135 (28.8)           | 113 (16.9)  |         |                                                                |
| Master                                    | 30 (12.3)            | 24 (4.6)    |         | 85 (18.1)            | 50 (7.5)    |         |                                                                |
| Other degree or no degree                 | 43 (17.7)            | 11 (2.1)    |         | 45 (9.6)             | 19 (2.8)    |         |                                                                |
| Home institution, n (%)                   |                      |             | 0.37    |                      |             | 0.23    | 0.66                                                           |
| University                                | 66 (27.2)            | 110 (20.8)  |         | 151 (32.2)           | 192 (28.7)  |         |                                                                |
| Medical school or hospital                | 132 (54.3)           | 334 (63.3)  |         | 221 (47.1)           | 372 (55.5)  |         |                                                                |
| Public agency                             | 20 (8.2)             | 31 (5.9)    |         | 48 (10.2)            | 55 (8.2)    |         |                                                                |
| Industry                                  | 11 (4.5)             | 29 (5.5)    |         | 20 (4.3)             | 21 (3.1)    |         |                                                                |
| Foundation or other non-profit            | 8 (3.3)              | 10 (1.9)    |         | 21 (4.5)             | 19 (2.8)    |         |                                                                |
| Contract research organisation or similar | 5 (2.1)              | 10 (1.9)    |         | 6 (1.3)              | 5 (0.8)     |         |                                                                |
| Other                                     | 1 (0.4)              | 4 (0.8)     |         | 2 (0.4)              | 6 (0.9)     |         |                                                                |
| Country/continent, n (%)                  |                      |             | 0.01    |                      |             | 0.06    | 0.52                                                           |
| USA                                       | 188 (77.4)           | 347 (65.7)  |         | 368 (78.5)           | 466 (69.6)  |         |                                                                |
| Canada                                    | 12 (4.9)             | 23 (4.4)    |         | 32 (6.8)             | 58 (8.7)    |         |                                                                |
| Europe                                    | 36 (14.8)            | 99 (18.8)   |         | 48 (10.2)            | 100 (14.9)  |         |                                                                |
| Other                                     | 7 (2.9)              | 59 (11.2)   |         | 21 (4.5)             | 46 (6.9)    |         |                                                                |

<sup>a</sup> P-value testing an interaction between each variable listed and the year in the assessment of gender differences.

Table 2. Comparison of author contributions by gender, stratified by the year of publication.

| Variables                                                           | 2000                 |             |         | 2015                 |             |         | Change in gender differences over time (p-value <sup>a</sup> ) |
|---------------------------------------------------------------------|----------------------|-------------|---------|----------------------|-------------|---------|----------------------------------------------------------------|
|                                                                     | Women (n=243, 31.5%) | Men (n=528) | p-value | Women (n=469, 41.2%) | Men (n=670) | p-value |                                                                |
| Contributions in the paper, n (%)                                   |                      |             |         |                      |             |         |                                                                |
| Conception and design                                               | 134 (55.1)           | 323 (61.2)  | 0.03    | 223 (47.6)           | 372 (55.5)  | 0.001   | 0.81                                                           |
| Analysis and interpretation of the data                             | 176 (72.4)           | 362 (68.6)  | 0.78    | 342 (72.9)           | 496 (74.0)  | 0.22    | 0.58                                                           |
| Drafting of the article                                             | 110 (45.3)           | 206 (39.0)  | 0.35    | 222 (47.3)           | 298 (44.5)  | 0.61    | 0.67                                                           |
| Critical revision of the article for important intellectual content | 171 (70.4)           | 426 (80.7)  | <0.001  | 317 (67.6)           | 535 (79.9)  | <0.001  | 0.94                                                           |
| Provision of materials/patients                                     | 106 (43.6)           | 244 (46.2)  | 0.75    | 98 (20.9)            | 178 (26.6)  | 0.05    | 0.29                                                           |
| Obtaining of funding                                                | 39 (16.1)            | 114 (21.6)  | 0.02    | 66 (14.1)            | 134 (20.0)  | <0.001  | 0.60                                                           |
| Statistical expertise                                               | 49 (20.2)            | 125 (23.7)  | 0.24    | 103 (22.0)           | 157 (23.4)  | 0.56    | 0.60                                                           |
| Administrative, technical and logistic support                      | 85 (35.0)            | 137 (26.0)  | 0.02    | 147 (31.3)           | 178 (26.6)  | 0.27    | 0.25                                                           |
| Collection and assembly of data                                     | 121 (49.8)           | 242 (45.8)  | 0.05    | 260 (55.4)           | 306 (45.7)  | 0.008   | 0.90                                                           |
| Final approval of the article                                       | 196 (80.7)           | 453 (85.8)  | 0.04    | 404 (86.1)           | 602 (89.9)  | 0.08    | 0.69                                                           |
| Author position, n (%)                                              |                      |             | 0.01    |                      |             | 0.003   | 0.84                                                           |
| First                                                               | 35 (14.4)            | 69 (13.1)   |         | 55 (11.7)            | 74 (11.0)   |         |                                                                |
| Second                                                              | 40 (16.5)            | 51 (9.7)    |         | 51 (10.9)            | 56 (8.4)    |         |                                                                |
| Middle                                                              | 117 (48.1)           | 256 (48.5)  |         | 290 (61.8)           | 377 (56.3)  |         |                                                                |
| Next-to-last                                                        | 29 (11.9)            | 70 (13.3)   |         | 40 (8.5)             | 77 (11.5)   |         |                                                                |
| Last                                                                | 22 (9.0)             | 82 (15.5)   |         | 33 (7.0)             | 86 (12.8)   |         |                                                                |

<sup>a</sup> P-value testing an interaction between each variable listed and the year in the assessment of gender differences. All p-values are obtained from mixed-effects logistic regression models.

**Table 3. Association between female gender and 10 contributions to a research paper by year, univariate (left columns) and multivariable models (right columns) after adjustment for academic degrees.**

| Contributions                                                       | Univariate analysis |           |         | Adjusted for degrees |           |         |
|---------------------------------------------------------------------|---------------------|-----------|---------|----------------------|-----------|---------|
|                                                                     | OR                  | 95% CI    | p-value | OR                   | 95% CI    | p-value |
| Conception and design                                               |                     |           |         |                      |           |         |
| 2000                                                                | 0.67                | 0.48-0.95 | 0.026   | 0.86                 | 0.60-1.24 | 0.42    |
| 2015                                                                | 0.64                | 0.49-0.84 | 0.001   | 0.76                 | 0.57-1.02 | 0.06    |
| Analysis and interpretation of data                                 |                     |           |         |                      |           |         |
| 2000                                                                | 0.95                | 0.64-1.39 | 0.78    | 0.99                 | 0.66-1.49 | 0.95    |
| 2015                                                                | 0.83                | 0.61-1.12 | 0.22    | 0.75                 | 0.54-1.04 | 0.09    |
| Drafting of the article                                             |                     |           |         |                      |           |         |
| 2000                                                                | 1.18                | 0.84-1.65 | 0.35    | 1.31                 | 0.92-1.86 | 0.14    |
| 2015                                                                | 1.07                | 0.82-1.39 | 0.61    | 1.16                 | 0.88-1.52 | 0.30    |
| Critical revision of the article for important intellectual content |                     |           |         |                      |           |         |
| 2000                                                                | 0.50                | 0.33-0.75 | <0.001  | 0.69                 | 0.45-1.06 | 0.09    |
| 2015                                                                | 0.51                | 0.38-0.70 | <0.001  | 0.64                 | 0.46-0.89 | 0.008   |
| Provision of materials/patients                                     |                     |           |         |                      |           |         |
| 2000                                                                | 0.94                | 0.64-1.37 | 0.75    | 1.57                 | 1.03-2.40 | 0.04    |
| 2015                                                                | 0.72                | 0.51-1.00 | 0.05    | 1.12                 | 0.78-1.62 | 0.54    |
| Statistical expertise                                               |                     |           |         |                      |           |         |
| 2000                                                                | 0.79                | 0.53-1.17 | 0.24    | 0.53                 | 0.34-0.82 | 0.005   |
| 2015                                                                | 0.91                | 0.68-1.23 | 0.56    | 0.59                 | 0.42-0.83 | 0.002   |
| Obtaining of funding                                                |                     |           |         |                      |           |         |
| 2000                                                                | 0.60                | 0.39-0.94 | 0.02    | 0.81                 | 0.51-1.28 | 0.36    |
| 2015                                                                | 0.52                | 0.36-0.74 | <0.001  | 0.62                 | 0.43-0.91 | 0.01    |
| Administrative, technical, and logistic support                     |                     |           |         |                      |           |         |
| 2000                                                                | 1.55                | 1.08-2.25 | 0.2     | 1.10                 | 0.74-1.63 | 0.63    |
| 2015                                                                | 1.18                | 0.88-1.58 | 0.26    | 1.01                 | 0.75-1.38 | 0.93    |
| Collection and assembly of data                                     |                     |           |         |                      |           |         |
| 2000                                                                | 1.42                | 0.99-2.03 | 0.05    | 1.13                 | 0.78-1.64 | 0.52    |
| 2015                                                                | 1.46                | 1.11-1.93 | 0.008   | 1.35                 | 1.01-1.81 | 0.04    |
| Final approval                                                      |                     |           |         |                      |           |         |
| 2000                                                                | 0.60                | 0.37-0.97 | 0.04    | 0.85                 | 0.51-1.41 | 0.52    |
| 2015                                                                | 0.69                | 0.45-1.04 | 0.08    | 0.92                 | 0.59-1.44 | 0.73    |

Abbreviations : OR : odds ratio ; 95% CI: 95% confidence interval

**Table 4. Association between female gender and position on the byline by year, in univariate analysis (left columns) and after adjustment for research contributions to the project (right columns).**

| Author position (vs. middle) <sup>a</sup> | Univariate analysis |           |         | Adjusted for contributions |           |         |
|-------------------------------------------|---------------------|-----------|---------|----------------------------|-----------|---------|
|                                           | OR                  | 95% CI    | p-value | OR                         | 95% CI    | p-value |
| First                                     |                     |           |         |                            |           |         |
| 2000                                      | 0.99                | 0.56-1.73 | 0.96    | 1.23                       | 0.35-4.33 | 0.74    |
| 2015                                      | 1.00                | 0.65-1.56 | 0.98    | 1.44                       | 0.69-3.01 | 0.33    |
| Second                                    |                     |           |         |                            |           |         |
| 2000                                      | 1.55                | 0.89-2.72 | 0.12    | 1.94                       | 1.05-3.59 | 0.03    |
| 2015                                      | 1.12                | 0.68-1.84 | 0.67    | 1.28                       | 0.75-2.21 | 0.37    |
| Next-to-last                              |                     |           |         |                            |           |         |
| 2000                                      | 0.63                | 0.34-1.17 | 0.14    | 0.73                       | 0.39-1.36 | 0.33    |
| 2015                                      | 0.58                | 0.36-0.93 | 0.02    | 0.59                       | 0.36-0.96 | 0.03    |
| Last                                      |                     |           |         |                            |           |         |
| 2000                                      | 0.55                | 0.30-1.01 | 0.05    | 0.80                       | 0.32-1.98 | 0.62    |
| 2015                                      | 0.46                | 0.28-0.75 | 0.002   | 0.71                       | 0.37-1.37 | 0.31    |

Abbreviations : OR : odds ratio ; 95% CI: 95% confidence interval

<sup>a</sup> 36 articles with four or less authors were excluded from the analyses.

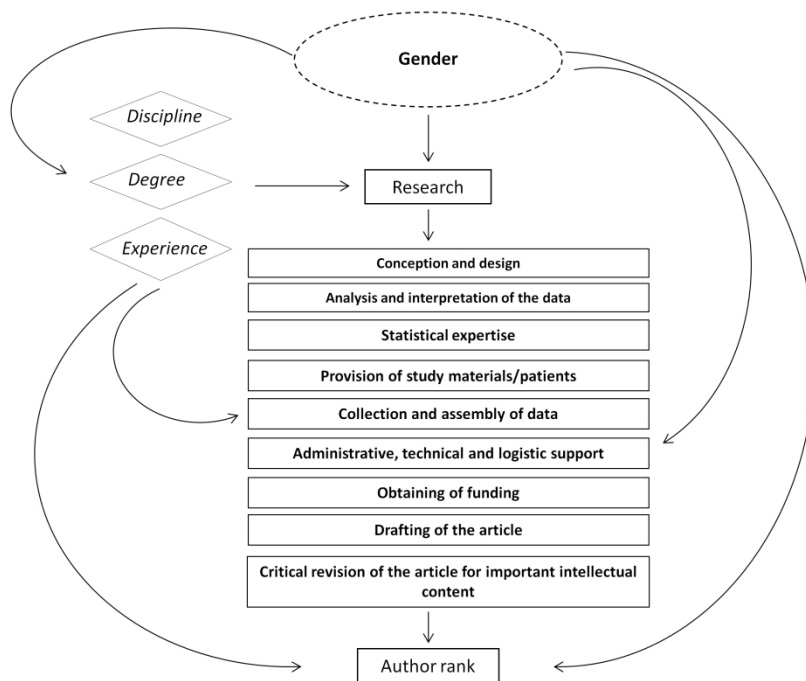

Figure 1



**STROBE 2007 (v4) Statement—Checklist of items that should be included in reports of *cross-sectional studies***

| Section/Topic             | Item # | Recommendation                                                                                                                                                                       | Reported on page # |
|---------------------------|--------|--------------------------------------------------------------------------------------------------------------------------------------------------------------------------------------|--------------------|
| <b>Title and abstract</b> | 1      | (a) Indicate the study’s design with a commonly used term in the title or the abstract                                                                                               | 1-2                |
|                           |        | (b) Provide in the abstract an informative and balanced summary of what was done and what was found                                                                                  | 2                  |
| <b>Introduction</b>       |        |                                                                                                                                                                                      |                    |
| Background/rationale      | 2      | Explain the scientific background and rationale for the investigation being reported                                                                                                 | 5-6                |
| Objectives                | 3      | State specific objectives, including any prespecified hypotheses                                                                                                                     | 5                  |
| <b>Methods</b>            |        |                                                                                                                                                                                      |                    |
| Study design              | 4      | Present key elements of study design early in the paper                                                                                                                              | 7                  |
| Setting                   | 5      | Describe the setting, locations, and relevant dates, including periods of recruitment, exposure, follow-up, and data collection                                                      | 7                  |
| Participants              | 6      | (a) Give the eligibility criteria, and the sources and methods of selection of participants                                                                                          | 7                  |
| Variables                 | 7      | Clearly define all outcomes, exposures, predictors, potential confounders, and effect modifiers. Give diagnostic criteria, if applicable                                             | 7-8                |
| Data sources/ measurement | 8*     | For each variable of interest, give sources of data and details of methods of assessment (measurement). Describe comparability of assessment methods if there is more than one group | 7-8                |
| Bias                      | 9      | Describe any efforts to address potential sources of bias                                                                                                                            | 7                  |
| Study size                | 10     | Explain how the study size was arrived at                                                                                                                                            | 8                  |
| Quantitative variables    | 11     | Explain how quantitative variables were handled in the analyses. If applicable, describe which groupings were chosen and why                                                         | NA                 |
| Statistical methods       | 12     | (a) Describe all statistical methods, including those used to control for confounding                                                                                                | 9-10               |
|                           |        | (b) Describe any methods used to examine subgroups and interactions                                                                                                                  | 9                  |
|                           |        | (c) Explain how missing data were addressed                                                                                                                                          | NA                 |
|                           |        | (d) If applicable, describe analytical methods taking account of sampling strategy                                                                                                   | NA                 |
|                           |        | (e) Describe any sensitivity analyses                                                                                                                                                | NA                 |
| <b>Results</b>            |        |                                                                                                                                                                                      |                    |

|                          |     |                                                                                                                                                                                                              |            |
|--------------------------|-----|--------------------------------------------------------------------------------------------------------------------------------------------------------------------------------------------------------------|------------|
| Participants             | 13* | (a) Report numbers of individuals at each stage of study—eg numbers potentially eligible, examined for eligibility, confirmed eligible, included in the study, completing follow-up, and analysed            | 10         |
|                          |     | (b) Give reasons for non-participation at each stage                                                                                                                                                         | NA         |
|                          |     | (c) Consider use of a flow diagram                                                                                                                                                                           | NA         |
| Descriptive data         | 14* | (a) Give characteristics of study participants (eg demographic, clinical, social) and information on exposures and potential confounders                                                                     | 10+Table 1 |
|                          |     | (b) Indicate number of participants with missing data for each variable of interest                                                                                                                          | NA         |
| Outcome data             | 15* | Report numbers of outcome events or summary measures                                                                                                                                                         | Table 2    |
| Main results             | 16  | (a) Give unadjusted estimates and, if applicable, confounder-adjusted estimates and their precision (eg, 95% confidence interval). Make clear which confounders were adjusted for and why they were included | Tables 3-4 |
|                          |     | (b) Report category boundaries when continuous variables were categorized                                                                                                                                    | NA         |
|                          |     | (c) If relevant, consider translating estimates of relative risk into absolute risk for a meaningful time period                                                                                             | NA         |
| Other analyses           | 17  | Report other analyses done—eg analyses of subgroups and interactions, and sensitivity analyses                                                                                                               | NA         |
| <b>Discussion</b>        |     |                                                                                                                                                                                                              |            |
| Key results              | 18  | Summarise key results with reference to study objectives                                                                                                                                                     | 11         |
| Limitations              | 19  | Discuss limitations of the study, taking into account sources of potential bias or imprecision. Discuss both direction and magnitude of any potential bias                                                   | 14         |
| Interpretation           | 20  | Give a cautious overall interpretation of results considering objectives, limitations, multiplicity of analyses, results from similar studies, and other relevant evidence                                   | 12-14      |
| Generalisability         | 21  | Discuss the generalisability (external validity) of the study results                                                                                                                                        | 14-15      |
| <b>Other information</b> |     |                                                                                                                                                                                                              |            |
| Funding                  | 22  | Give the source of funding and the role of the funders for the present study and, if applicable, for the original study on which the present article is based                                                | NA         |

\*Give information separately for cases and controls in case-control studies and, if applicable, for exposed and unexposed groups in cohort and cross-sectional studies.

**Note:** An Explanation and Elaboration article discusses each checklist item and gives methodological background and published examples of transparent reporting. The STROBE checklist is best used in conjunction with this article (freely available on the Web sites of PLoS Medicine at <http://www.plosmedicine.org/>, Annals of Internal Medicine at <http://www.annals.org/>, and Epidemiology at <http://www.epidem.com/>). Information on the STROBE Initiative is available at [www.strobe-statement.org](http://www.strobe-statement.org).

# BMJ Open

## Comparison of the contributions of female and male authors to medical research in 2000 and 2015: a cross-sectional study

|                                 |                                                                                                                                                                                                                                                                                                                                                 |
|---------------------------------|-------------------------------------------------------------------------------------------------------------------------------------------------------------------------------------------------------------------------------------------------------------------------------------------------------------------------------------------------|
| Journal:                        | <i>BMJ Open</i>                                                                                                                                                                                                                                                                                                                                 |
| Manuscript ID                   | bmjopen-2018-024436.R2                                                                                                                                                                                                                                                                                                                          |
| Article Type:                   | Research                                                                                                                                                                                                                                                                                                                                        |
| Date Submitted by the Author:   | 13-Dec-2018                                                                                                                                                                                                                                                                                                                                     |
| Complete List of Authors:       | Gayet-Ageron, Angele; Hopitaux Universitaires de Geneve, Medical Directorate / Division of Clinical Epidemiology<br>Poncet, Antoine; Hopitaux Universitaires de Geneve, Medical Directorate / Division of Clinical Epidemiology<br>Perneger, Thomas; Hopitaux Universitaires de Geneve, Medical Directorate / Division of Clinical Epidemiology |
| <b>Primary Subject Heading</b>: | Sociology                                                                                                                                                                                                                                                                                                                                       |
| Secondary Subject Heading:      | Epidemiology, Medical publishing and peer review                                                                                                                                                                                                                                                                                                |
| Keywords:                       | Gender, Publication, Research, Authorship                                                                                                                                                                                                                                                                                                       |
|                                 |                                                                                                                                                                                                                                                                                                                                                 |

SCHOLARONE™  
Manuscripts

1  
2  
3 **Comparison of the contributions of female and male authors to medical**  
4  
5  
6 **research in 2000 and 2015: a cross-sectional study**  
7  
8

9 Angèle Gayet-Ageron, MD, PhD<sup>1</sup>, Antoine Poncet, MS<sup>2</sup>, Thomas V Perneger, MD, PhD<sup>3</sup>  
10  
11

12  
13  
14  
15 <sup>1</sup> Senior physician, Division of Clinical Epidemiology, University Hospitals of Geneva and,  
16 Faculty of Medicine, Geneva, Switzerland  
17

18  
19  
20 <sup>2</sup> Statistician, Division of Clinical Epidemiology, University Hospitals of Geneva and, Faculty  
21 of Medicine, Geneva, Switzerland  
22  
23

24  
25  
26 <sup>3</sup> Head, Division of Clinical Epidemiology, University Hospitals of Geneva and, Faculty of  
27 Medicine, Geneva, Switzerland  
28  
29

30  
31  
32  
33  
34  
35 **Keywords:** Gender; Publications ; Research ; Authorship.  
36

37  
38 **Word count:** 3066.  
39  
40  
41  
42  
43

44 Corresponding author: Angèle Gayet-Ageron, MD, PhD, Division of Clinical Epidemiology,  
45 University Hospitals of Geneva, 6 Rue Gabrielle Perret-Gentil, 1211 Geneva 14, Switzerland.  
46  
47

48 Tel.: +41 22 372 9027; fax: +41 22 372 9035. Email: [angele.gayet-ageron@hcuge.ch](mailto:angele.gayet-ageron@hcuge.ch)  
49  
50  
51  
52  
53  
54  
55  
56  
57  
58  
59  
60

## Abstract

**Objectives:** The proportion of women engaged in clinical research has increased over time. However, it is unclear if women and men contribute to the same extent during the conduct of research and, if so, if they are equally rewarded by a strategic first or last author position. We aim to describe the prevalence of women authors of original articles published 15 years apart and to compare the research contributions and author positions according to gender.

**Design:** Repeated cross-sectional study.

**Setting:** Published original articles.

**Participants:** 1910 authors of 223 original articles published in the *Annals of Internal Medicine* in 2000 and 2015.

**Primary and secondary outcomes measures:** Self-reported contributions to 10 aspects of the article (primary) and author position on the byline.

**Results:** The proportion of women authors increased from 32% (n=243) to 41% (n=469) between 2000 and 2015 ( $p<0.0001$ ). In 2000, women authors were less frequently involved than men in the conception and design (134 [55%] vs. 323 [61%];  $p=0.0256$ ), critical revision (171 [70%] vs. 426 [81%];  $p=0.0009$ ), final approval (196 [81%] vs. 453 [86%];  $p=0.0381$ ), and obtaining of funding (39 [16%] vs. 114 [22%];  $p=0.0245$ ). Women were more frequently involved than men in administration and logistics (85 [35%] vs. 137 [26%];  $p=0.0188$ ) and data collection (121 [50%] vs. 242 [46%];  $p=0.0532$ ), but they were similarly involved in the analysis and interpretation of data, drafting of the manuscript, provision of materials/patients, and statistical expertise. Women were less often last authors than men (22 [9%] vs. 82 [16%];  $p=0.0102$ ). These gender differences persisted in 2015.

1  
2  
3 **Conclusions:** The representation of women among authors of medical articles increased  
4 notably between 2000 and 2015, but still remained below 50%. Women's roles differed from  
5 those of men with no change over time.  
6  
7  
8  
9  
10  
11  
12  
13  
14  
15  
16  
17  
18  
19  
20  
21  
22  
23  
24  
25  
26  
27  
28  
29  
30  
31  
32  
33  
34  
35  
36  
37  
38  
39  
40  
41  
42  
43  
44  
45  
46  
47  
48  
49  
50  
51  
52  
53  
54  
55  
56  
57  
58  
59  
60

For peer review only

## Article summary

### Strengths and limitations of this study

- We used all original articles and reviews published in 2000 and 2015 in a single, widely-cited USA-based medical journal that provides a constant and standard format for reporting author contributions in contrast to other medical journals that do not report author contributions in a consistent way over time.
- We assessed 10 self-reported contributions of all authors of the selected original articles papers by gender 15 years apart.
- We compared the authors' position on the byline by gender 15 years apart after adjustment for their self-reported contributions.
- We did not obtain information on the authors' age, past experience in research, professorial rank, medical specialty and primary scientific discipline, which may all contribute to gender differences in specific research roles and this may decrease the interpretation of findings.

## Introduction

Over the past decades, the proportion of women in medical sciences has increased worldwide.<sup>1-5</sup> This demographic change should be associated in theory with a higher representation of women authoring scientific publications.<sup>6</sup> In principle, women should make equivalent contributions to research and have the same opportunity to lead research projects as men. Furthermore, we should observe increased numbers of women at academic leadership positions.<sup>5</sup> However, the chances of succeeding in research and obtaining a senior position are not the same for men and women with similar competencies.<sup>7</sup> Women face also more difficulties than men in finding a mentor to help them manage their careers and facilitate their advancement, and productivity.<sup>7,8</sup> Finally, women scientists are less likely than men to get funded or to coauthor scientific publications.<sup>9</sup> A recent publication demonstrated that the contribution differed between female and male authors of articles published in journals from the Public Library of Science (PLoS).<sup>10</sup>

Currently, we do not fully understand how gender differences in indicators of academic achievement occur. One possibility is that men and women researchers do essentially the same things, but are not rewarded equitably by grants, author roles or tenured positions. Alternatively, the roles of men and women researchers may be different due to different trajectories during their training, in which case the unequal rewards would be merely a consequence of these different skills and contributions (Figure 1). It is important to understand this, because remedial actions would not be the same for these two types of gender inequality. Many universities have implemented programmes to facilitate women's careers in science in the past decades.<sup>9,11</sup> The effectiveness of such programmes is usually assessed through the gender ratio of academic promotions. However, promotions reflect only a late outcome and we know little about changes in gender roles during the conduct of research.



1  
2  
3 To clarify these issues, we conducted a cross-sectional study of original articles  
4  
5 published in the *Annals of Internal Medicine* 15 years apart. We selected this journal because  
6  
7 it applies a standardized description of 10 possible roles of all authors and this description has  
8  
9 remained stable over this time span, in contrast to other leading medical journals. Our main  
10  
11 objective was to compare the scientific contributions to medical research of female and male  
12  
13 authors at both time periods and to determine if gender differences that may have been present  
14  
15 in 2000 have narrowed or disappeared by 2015. Our secondary objective was to compare the  
16  
17 authorship position of female and male authors with similar contributions to the research  
18  
19 project and again to assess if there was a change between 2000 and 2015.  
20  
21  
22  
23  
24  
25  
26  
27  
28  
29  
30  
31  
32  
33  
34  
35  
36  
37  
38  
39  
40  
41  
42  
43  
44  
45  
46  
47  
48  
49  
50  
51  
52  
53  
54  
55  
56  
57  
58  
59  
60

## Methods

As the study was only based on a review of data publicly available online, prior approval from our institutional review board was not required for this study.

### Study design and population

We conducted a cross-sectional study of all original reports and reviews published in the *Annals of Internal Medicine* in two time periods: 1) from 1 January, 2000 to 31 December, 2000 and 2) from 1 January, 2015 to 31 December, 2015. Consensus statements, guidelines, clinical case reports and opinion papers were excluded because the author contributions criteria list does not fully fit these papers. All authors of the original research papers were included in the study population.

### Study variables

The main independent variables were the time period and author gender. We determined the gender of each author from their first names. If an author's gender was unclear to us, we used an internet search to find photographs and/or bibliographical information on the author. If this search was unproductive, we looked up the common usage of the first name.

The main dependent variables were the 10 possible contributions to the research paper as published in the *Annals*: 1) conception and design; 2) analysis and interpretation of the data; 3) drafting of the article; 4) critical revision of article for important intellectual content; 5) final approval of the article; 6) provision of study materials or patients; 7) statistical expertise; 8) obtaining of funding; 9) administrative, technical or logistic support; and 10) collection and assembly of data. We also retrieved the author's rank on the byline in five categories: first, second, middle, next-to-last and last positions. If there were four authors, the

1  
2  
3 middle author position was omitted; if there were three authors, the next-to-last position was  
4  
5 also omitted; when there were two authors, the second position was omitted. In the case of a  
6  
7 joint first author, the second position was not considered. We compared the first, second,  
8  
9 next-to-last, and last positions to the middle rank.  
10  
11  
12

13 Other variables collected at the author level were: degrees (MD or other medical degree  
14  
15 such as MBBS or DO, with or without an additional Master's degree or PhD; any PhD or  
16  
17 other doctoral degree alone, such as ScD or JD; any Master's degree alone), home institution  
18  
19 (university, including public health schools; medical school or hospital; public agency;  
20  
21 industry; foundation or other non-profit; contract research organisation or consulting firm,  
22  
23 including individuals who gave only a street address), country/continent of affiliation (USA,  
24  
25 Canada, Europe, and other). Independent variables at the article level was the type of funding  
26  
27 (industry funding and specific non-industry funding), and subject matter (disease,  
28  
29 prevention/behavior/education, and research methods/medico-economics/work environment).  
30  
31 For each article, variables were collected from the online publication by one of the  
32  
33 investigators (AGA, AP or TP) following pre-specified rules. Uncertainties were solved by  
34  
35 discussion and consensus between investigators.  
36  
37  
38  
39  
40  
41  
42  
43  
44

### 45 **Sample size estimation**

46  
47 An initial analysis of authorship profiles used all papers published in 2015.<sup>12</sup> For this analysis  
48  
49 of time trends and gender, we added all papers published in 2000. The study had a >90%  
50  
51 power to detect a difference in the prevalence of female authors of 10% (e.g., 40% vs. 50%),  
52  
53 even in the presence of a design effect of 2 due to intra-article correlation of author gender.  
54  
55  
56  
57  
58  
59  
60

## Statistical analysis

We described data at the author level and at the article level. We presented the author characteristic, contribution to publication and position on the byline by gender and by year of publication (2000 and 2015). First, we tested if the proportion of women varied between 2000 and 2015 by means of a mixed-effects logistic regression model with author gender as the dependent variable, a random effect at the article level, and fixed effect on the year of publication. Then we assessed if every author characteristic (degree, home institution, country/continent of affiliation) was associated with gender using three mixed-effects models as previously described (adding a fixed-effect on the author characteristic) and if each of these associations remained stable over time by including an interaction term between the year and the author characteristic. We compared the proportion of each subject matter between the two years using Chi-2 test.

We assessed the association and its evolution over time between gender and 10 specific contributions to research paper. We built 10 mixed-effects logistic regression models where the contribution was the dependent variable, the article was the random factor, and gender was the main fixed factor. In each model, we included the year and an interaction term between the year and gender to assess change over time. Finally, we reassessed these associations after adjustment for academic degrees. We reported both univariate and multivariable odds ratios (ORs) and 95% confidence intervals (95% CI) by the year of publication.

Finally, to identify if gender was associated with a specific position on the article byline, we performed four conditional logistic regression models where each article defined a cluster, with author position (e.g. first vs. middle rank) as the dependent variable and gender the main predictor. We included the year and an interaction term between the year and gender

1  
2  
3 to assess if there was a change over time of the associations between gender and author  
4  
5 position. Then we adjusted the models for the 10 authors' contributions to research. We built  
6  
7 four models, comparing the first, second, next-to-last and last position to middle position. In  
8  
9 these models, articles with four or fewer authors were excluded from the analyses.  
10  
11

12  
13 All analyses were performed using STATA version IC 15 for Windows (STATA Corp.,  
14  
15 College Station, Texas,). Statistical significance was defined as  $p < 0.05$  (two-sided).  
16  
17

### 18 19 20 21 **Patient and public involvement**

22  
23 Our study was an investigator-oriented research. Consequently, patients were not involved in  
24  
25 the development of the research question and outcome measures, nor in the study design, data  
26  
27 collection and conduct of the study. Therefore, we did not attempt to disseminate the results to  
28  
29 study participants as the study was based on publicly available data extracted from published  
30  
31 articles. However, these results were presented and discussed at an academic level in a Swiss  
32  
33 colloquium in internal medicine (SGAIM SSMIG SSGIM 1 June 2018, Basel, Switzerland)  
34  
35 and at the European Congress of Epidemiology 2018 (Lyon, France).  
36  
37  
38  
39  
40  
41  
42  
43  
44

### 45 **Results**

46  
47  
48 We included 223 research papers published in the *Annals of Internal Medicine*; 104 articles in  
49  
50 2000 and 119 in 2015 (53%). In total, 1910 authors were listed on the 223 papers; 771 in 2000  
51  
52 and 1139 in 2015 (60%). The average number of authors per article was 7.4 (standard  
53  
54 deviation [SD] 4.3; range 2-30) in 2000 and 9.6 (SD 5.4; range 2-29) in 2015. Thirty-six  
55  
56 articles included four or fewer authors. The distribution of each subject matter did not vary  
57  
58 between 2000 and 2015: articles related to diseases represented 83.7% of all articles in 2000  
59  
60

(n=87) compared with 80.7% in 2015 (n=96); articles related to prevention, behaviors or education represented 9.6% in 2000 (n=10) vs. 7.6% in 2015 (n=9); articles related to research methods, work environment or medico-economic analyses represented 6.7% in 2000 (n=7) vs. 11.8% in 2015 (n=14) (p=0.401).

### **Comparison of characteristics, contributions to research and position on the byline by gender in 2000 and 2015**

The proportion of women among authors increased by 10% between 2000 and 2015 (243 [32%] vs. 469 [41%];  $p < 0.0001$ ; Table 1). At the paper level, one article was written only by women authors in 2000 (1%) vs. three articles in 2015 (3%); 17 articles were written only by men authors in 2000 (16%) vs. 12 articles in 2015 (10%), and 86 articles had mixed women and men authors in 2000 (83%) vs. 104 in 2015 (87%). In both years, women had an MD and/or PhD degree less frequently compared to men (Table 1). Women did not differ from men regarding their home institution in both years. There were some minor differences in the country of affiliation between women and men. We did not find any change over time in the proportions of women and men by author characteristic ( $p > 0.05$  for all interaction tests).

### **Association between gender and contributions to research**

Women were less likely than men to contribute to the conception and design, critical revision of the article for important intellectual content, final approval of the article, and obtaining of funding, both in 2000 and 2015 (Table 2). In contrast, women contributed more frequently than men to administrative, technical or logistic support and to the collection and assembly of data both in 2000 and 2015. We did not find any statistical interactions between gender and

1  
2  
3 year of publication for each of the 10 contributions, i.e., no evidence of gender roles changing  
4  
5 over time. After adjustment for academic degrees (Table 3), most gender differences were  
6  
7 attenuated, which indicates that training explains part of the gender-related differences, except  
8  
9 for statistical expertise. However, this adjustment showed also that women contributed  
10  
11 significantly less to statistical expertise than men in 2000 and 2015.  
12  
13  
14  
15  
16  
17

### 18 **Association between gender and author position on the byline**

19  
20  
21 Women were more frequently in second position and less frequently in last position compared  
22  
23 to men (Table 2). Gender differences in author rank did not change over time. After  
24  
25 adjustment for author contributions (Table 4), the gender difference in last author positions  
26  
27 disappeared in both years. Furthermore, women appeared to be more likely to be listed second  
28  
29 on the byline (significantly so in 2000) and less likely to be next-to-last (significantly so in  
30  
31 2015).  
32  
33  
34  
35  
36  
37  
38  
39  
40  
41  
42  
43  
44  
45  
46  
47  
48  
49  
50  
51  
52  
53  
54  
55  
56  
57  
58  
59  
60

## Discussion

Our main finding is that the contributions to research of women and men authors differ considerably and that these gender roles have remained essentially unchanged between the years 2000 and 2015. At both time periods, women participated less frequently than men in study conception and design, statistical expertise, critical revision of the article, and obtaining of funding, but contributed more frequently to collection and assembly of data and to administrative, technical and logistic support. Regarding their place on the article byline, women were less likely to be last authors compared to men, again at both time periods. Nevertheless, the proportion of female authors has increased by 10% between 2000 and 2015. While this reflects progress toward equal gender representation in research, the proportion of women is still well below 50%.

Our study confirmed the trend toward a better representation of women in scientific publications. Underrepresentation of women in science and in medical fields in particular has been a constant finding over the past several decades.<sup>13</sup> This has prompted the launch of national programmes to improve the participation and advancement of women in academic careers.<sup>11</sup> The recent increase of female authors in scientific publications may be attributed to these initiatives. Similar to our study, Jagsi et al. reported an increase of women with a MD degree among the first and senior authors in six major journals between 1970 and 2004, including the *Annals of Internal Medicine*.<sup>14</sup> Filardo et al. described an increase from 28% in 1994 to 38% in 2014 in the proportion of female first authors in six prominent medical journals, also including the *Annals of Internal Medicine*.<sup>15</sup> Improvement in the representation of female first authors was the highest in Europe over the last four decades compared to other regions.<sup>16</sup> However, the proportions of female authors reported in scientific publications in the 2000s have remained below 50%. This may be due to women's preference for clinical and



1  
2  
3 teaching duties over research.<sup>17</sup> However, even if this were the case, why women would make  
4 such choices is an intriguing question.  
5  
6  
7

8  
9 An important finding of our study is the gender gap in research roles as captured by  
10 author contributions. This confirms the results of Macaluso et al. who showed that female  
11 authors in the PLoS journals were significantly less likely to be associated with analysis,  
12 design, contributing materials or writing of the paper compared to male authors, but that  
13 women were more likely to be associated with experimentation.<sup>10</sup> We propose here some  
14 possible explanations. First, women researchers may be on average younger and less  
15 experienced than men. As the increase in the proportion of women in medical sciences is  
16 recent, it may be years before women acquire the competencies and acquire the independence  
17 leading to more credit and accountability of their research. However, the differences between  
18 women and men authors have hardly changed between 2000 and 2015 as we would expect if  
19 it was merely a question of catching up. We noted that a larger proportion of female authors  
20 had non-terminal degrees and this might explain the higher proportion of non-leadership roles  
21 in the research teams. However, once adjusted for the degrees and research topic in the  
22 multivariate analyses, we confirmed that the roles in medical research were not the same  
23 between female and male authors. Another possibility is that women in science choose  
24 different career paths than men, and thus naturally take on different tasks (if so, why this  
25 should be the case would deserve exploration).<sup>18</sup> Finally, it is possible that the task  
26 differentiation reflects to some extent sexist attitudes that are prevalent in society – to  
27 caricature, women take care of various chores while men discuss lofty ideas in the smoking  
28 room. Some authors have argued that women may have a different self-perception of the tasks  
29 they should accomplish or not and may be less reluctant to perform administrative, technical  
30 or logistical tasks compared to their male counterparts.<sup>19</sup>  
31  
32  
33  
34  
35  
36  
37  
38  
39  
40  
41  
42  
43  
44  
45  
46  
47  
48  
49  
50  
51  
52  
53  
54  
55  
56  
57  
58  
59  
60

1  
2  
3 The author's position on the article byline depends on cumulative contributions and the  
4 type of tasks performed in the research project as well as seniority and responsibilities in the  
5 overall work.<sup>20</sup> We observed that women were less likely than men to be last authors  
6 compared to middle author positions. In their study, Jagsi et al. reported an increase in the  
7 proportion of women at last positions in scientific papers over a 30-year period.<sup>14</sup> As the  
8 position on the article byline likely depends on contributions to specific tasks, we adjusted our  
9 models on this variable and this masked the association between gender and senior author  
10 position. This finding suggests that the contribution to specific roles in the research project is  
11 key for achieving a prestigious position among authors.  
12  
13  
14  
15  
16  
17  
18  
19  
20  
21  
22  
23

24 This study has strengths and limitations. The originality of our study relies on the  
25 comparison of contributions reported in a standardized manner 15 years apart. Originally, we  
26 intended to include a sample of journals. However, we found out that most journals do not  
27 record author contributions in a consistent way over time, unlike the *Annals of Internal*  
28 *Medicine*, and this forced us to restrict our research to this single journal. However, restriction  
29 to a single journal may limit the generalisability of our findings. Second, the 10 contributions  
30 to research were self-reported and not verified by the study investigators. A previous study  
31 suggested that descriptions of contributions may lack reliability because they are frequently  
32 completed by the corresponding author of the paper.<sup>21</sup> Whether such errors may have biased  
33 the comparison of female and male authors is unclear. Third, we cannot totally exclude  
34 misclassification of some authors' gender. However, we used methods that were previously  
35 reported and assessed and believe that such errors should be rare.<sup>14,15</sup> Finally, we did not  
36 obtain information on the authors' age, past experience in research, professorial rank, medical  
37 specialty and primary scientific discipline, which may all contribute to gender differences in  
38 specific research roles (Figure 1). Therefore our ability to explain causes of gender  
39 differences remains limited.  
40  
41  
42  
43  
44  
45  
46  
47  
48  
49  
50  
51  
52  
53  
54  
55  
56  
57  
58  
59  
60

1  
2  
3 Our results highlight that research roles are not distributed equally between women and  
4 men researchers and that these differences have remained unchanged over a 15-year period.  
5  
6 This may be due to justifiable reasons, such as seniority, specific training and skills in  
7  
8 research, or role preferences of the researchers. However, the possibility also exists that the  
9  
10 academic research milieu perpetuates sexist attitudes and unequal treatment of researchers  
11  
12 based solely on their gender. This issue requires further exploration, and justifies the  
13  
14 continuation of local initiatives (such as gender equality commissions in universities, or  
15  
16 mentoring programmes) that promote women's involvement in research and ensure fair career  
17  
18 opportunities, regardless of gender.  
19  
20  
21  
22  
23  
24  
25  
26  
27  
28  
29  
30  
31  
32  
33  
34  
35  
36  
37  
38  
39  
40  
41  
42  
43  
44  
45  
46  
47  
48  
49  
50  
51  
52  
53  
54  
55  
56  
57  
58  
59  
60

## Acknowledgements

The authors wish to thank Rosemary Sudan for editorial assistance of the final version of the manuscript.

For peer review only

## Funding statement

This research received no specific grant from any funding agency in the public, commercial or not-for-profit sectors.

For peer review only

1  
2  
3  
4  
5  
6 **Competing interest**  
7  
8  
9

10 None.  
11  
12  
13  
14  
15  
16  
17  
18  
19  
20  
21  
22  
23  
24  
25  
26  
27  
28  
29  
30  
31  
32  
33  
34  
35  
36  
37  
38  
39  
40  
41  
42  
43  
44  
45  
46  
47  
48  
49  
50  
51  
52  
53  
54  
55  
56  
57  
58  
59  
60

For peer review only

## Author contributions

**Angèle Gayet-Ageron** participated in the conception & design; analysis & interpretation of data and she performed the statistical analyses. She contributed to the provision of study materials, collection & assembly of data, and she also provided administrative, technical, or logistic support. She drafted the first version of the manuscript and participated to the critical revision of it for important intellectual content. She has approved final version of the article.

**Antoine Poncet** participated in the conception & design; analysis & interpretation of data. He contributed to the provision of study materials, collection & assembly of data and also to administrative, technical, or logistic support. He participated to the critical revision of the article for important intellectual content. He has approved final version of the article..

**Thomas Perneger** participated in the conception & design; analysis & interpretation of data. He contributed to the provision of study materials, collection & assembly of data and also to administrative, technical, or logistic support. He participated to the critical revision of the article for important intellectual content. He has approved final version of the article.

1  
2  
3 **Data sharing statement**  
4

5 No unrestricted data sharing at this time. Interested parties may contact the corresponding  
6  
7  
8 author to gain access to the dataset.  
9

10  
11  
12  
13  
14  
15  
16  
17  
18  
19  
20  
21  
22  
23  
24  
25  
26  
27  
28  
29  
30  
31  
32  
33  
34  
35  
36  
37  
38  
39  
40  
41  
42  
43  
44  
45  
46  
47  
48  
49  
50  
51  
52  
53  
54  
55  
56  
57  
58  
59  
60

For peer review only



## References

- 1 Burton KR, Wong IK. A force to contend with: The gender gap closes in Canadian medical schools. *CMAJ*. 2004;170:1385-6.
- 2 Barzansky B, Etzel SI. Medical schools in the United States, 2006-2007. *JAMA*. 2007;298:1071-7.
- 3 Levinson W, Lurie N. When most doctors are women: what lies ahead? *Ann Intern Med*. 2004;141:471-4.
- 4 Phillips SP. The growing number of female physicians: meanings, values, and outcomes. *Isr J Health Policy Res*. 2013;2:47.
- 5 Ramakrishnan A, Sambuco D, Jagsi R. Women's participation in the medical profession: insights from experiences in Japan, Scandinavia, Russia, and Eastern Europe. *J Womens Health (Larchmt)*. 2014;23:927-34.
- 6 Lambert TW, Goldacre MJ, Turner G. Career choices of United Kingdom medical graduates of 1999 and 2000: questionnaire surveys. *BMJ*. 2003;326:194-5.
- 7 Moss-Racusin CA, Dovidio JF, Brescoll VL, Graham MJ, Handelsman J. Science faculty's subtle gender biases favor male students. *Proc Natl Acad Sci U S A*. 2012;109:16474-9. doi:10.1073/pnas.1211286109.
- 8 Sambujak D, Straus SE, Marusic A. Mentoring in academic medicine: a systematic review. *JAMA*. 2006;296:1103-1115.
- 9 Jagsi R, Motomura AR, Griffith KA, Rangarajan S, Ubel PA. Sex differences in attainment of independent funding by career development awardees. *Ann Intern Med*. 2009;151:804-811.
- 10 Malacuso B, Larivière V, Sugimoto T, Sugimoto CR. Is Science Built on the Shoulders of Women? A Study of Gender Differences in Contributorship. *Acad Med*. 2016;91:1136-1142

- 1  
2  
3 11 ADVANCE: Increasing the Participation and Advancement of Women in Academic  
4  
5 Science and Engineering Careers (ADVANCE).  
6  
7  
8 [https://www.nsf.gov/funding/pgm\\_summ.jsp?pims\\_id=5383](https://www.nsf.gov/funding/pgm_summ.jsp?pims_id=5383). Accessed on May 9,  
9  
10 2017.  
11  
12 12 Perneger TV, Poncet A, Carpentier M, Agoritsas T, Combescure C, Gayet-Ageron A.  
13  
14 Thinker, soldier, scribe: cross-sectional study of researchers' roles and author order in  
15  
16 the Annals of Internal Medicine. *BMJ Open*. 2017;7:e013898.  
17  
18  
19 13 Handelsman J, Cantor N, Carnes M, Denton D, Fine E, Grosz B, et al. Careers in  
20  
21 science. More women in Science. *Science*. 2005;309:1190-1.  
22  
23  
24 14 Jagsi R, Guancial EA, Worobey CC, Henault LE, Chang Y, Starr R, et al. The "gender  
25  
26 gap" in authorship of academic medical literature--a 35-year perspective. *N Engl J*  
27  
28 *Med*. 2006;355:281-7.  
29  
30  
31 15 Filardo G, da Graca B, Sass DM, Pollock BD, Smith EB, Martinez MAM. Trends and  
32  
33 comparison of femal first authorship in high impact medical journals: observational  
34  
35 study (1994-2014). *BMJ*. 2016;352:847-54.  
36  
37  
38 16 Wininger AE, Fischer JP, Likine EF, Gudeman AS, Brinker AR, Ryu J, et al.  
39  
40 Bibliometric Analysis of Female Authorship Trends and Collaboration Dynamics  
41  
42 Over JBMR's 30-Year History. *J Bone Miner Res*. 2017;32:2405-14.  
43  
44  
45 17 Amrein K, Langmann A, Fahrleitner-Pammer A, Pieber TR, Zollner-Schwetz I.  
46  
47 Women underrepresented on editorial boards of 60 major medical journals. *Gend*  
48  
49 *Med*. 2011;8:378-87.  
50  
51  
52 18 Sidhu R, Rajashekhar P, Lavin VL, Parry J, Attwood J, Holdcroft A, et al. The gender  
53  
54 imbalance in academic medicine: a study of female authorship in the United Kingdom.  
55  
56 *J R Soc Med*. 2009;102: 337–342  
57  
58  
59  
60

- 1  
2  
3 19 Zbar A, Frank E. Significance of authorship position: an open-ended international  
4 assessment. *Am J Med Sci*. 2011;341:106-9.  
5  
6  
7 20 Rudman LA. Self-promotion as a risk factor for women: the costs and benefits of  
8 counterstereotypical impression management. *J Pers Soc Psychol*. 1998;74:629-45.  
9  
10  
11  
12 21 Ilakovac V, Fister K, Marusic M, Marusic A. Reliability of disclosure forms of  
13 authors' contributions. *CMAJ*. 2007;176:41-6.  
14  
15  
16  
17  
18  
19  
20  
21  
22  
23  
24  
25  
26  
27  
28  
29  
30  
31  
32  
33  
34  
35  
36  
37  
38  
39  
40  
41  
42  
43  
44  
45  
46  
47  
48  
49  
50  
51  
52  
53  
54  
55  
56  
57  
58  
59  
60

For peer review only

1  
2  
3 **Figure legend**  
4  
5  
6

7 **Figure 1. Possible mechanisms explaining gender bias in the authorship of scientific publications.**  
8  
9

10  
11  
12  
13  
14  
15  
16  
17  
18  
19  
20  
21  
22  
23  
24  
25  
26  
27  
28  
29  
30  
31  
32  
33  
34  
35  
36  
37  
38  
39  
40  
41  
42  
43  
44  
45  
46  
47  
48  
49  
50  
51  
52  
53  
54  
55  
56  
57  
58  
59  
60

For peer review only

**Table 1. Comparison of author and study characteristics by gender, stratified by the year of publication.**

| Variables                                 | 2000                 |             |         | 2015                 |             |         | Change in gender differences over time (p-value <sup>a</sup> ) |
|-------------------------------------------|----------------------|-------------|---------|----------------------|-------------|---------|----------------------------------------------------------------|
|                                           | Women (n=243, 31.5%) | Men (n=528) | p-value | Women (n=469, 41.2%) | Men (n=670) | p-value |                                                                |
| Education, n (%)                          |                      |             | <0.001  |                      |             | <0.001  | 0.17                                                           |
| MD                                        | 92 (37.9)            | 343 (65.0)  |         | 120 (25.6)           | 291 (43.4)  |         |                                                                |
| MD and PhD                                | 12 (4.9)             | 56 (10.6)   |         | 18 (3.8)             | 88 (13.1)   |         |                                                                |
| MD and Master                             | 26 (10.7)            | 35 (6.6)    |         | 66 (14.1)            | 109 (16.3)  |         |                                                                |
| PhD                                       | 40 (16.5)            | 59 (11.2)   |         | 135 (28.8)           | 113 (16.9)  |         |                                                                |
| Master                                    | 30 (12.3)            | 24 (4.6)    |         | 85 (18.1)            | 50 (7.5)    |         |                                                                |
| Other degree or no degree                 | 43 (17.7)            | 11 (2.1)    |         | 45 (9.6)             | 19 (2.8)    |         |                                                                |
| Home institution, n (%)                   |                      |             | 0.37    |                      |             | 0.23    | 0.66                                                           |
| University                                | 66 (27.2)            | 110 (20.8)  |         | 151 (32.2)           | 192 (28.7)  |         |                                                                |
| Medical school or hospital                | 132 (54.3)           | 334 (63.3)  |         | 221 (47.1)           | 372 (55.5)  |         |                                                                |
| Public agency                             | 20 (8.2)             | 31 (5.9)    |         | 48 (10.2)            | 55 (8.2)    |         |                                                                |
| Industry                                  | 11 (4.5)             | 29 (5.5)    |         | 20 (4.3)             | 21 (3.1)    |         |                                                                |
| Foundation or other non-profit            | 8 (3.3)              | 10 (1.9)    |         | 21 (4.5)             | 19 (2.8)    |         |                                                                |
| Contract research organisation or similar | 5 (2.1)              | 10 (1.9)    |         | 6 (1.3)              | 5 (0.8)     |         |                                                                |
| Other                                     | 1 (0.4)              | 4 (0.8)     |         | 2 (0.4)              | 6 (0.9)     |         |                                                                |
| Country/continent, n (%)                  |                      |             | 0.01    |                      |             | 0.06    | 0.52                                                           |
| USA                                       | 188 (77.4)           | 347 (65.7)  |         | 368 (78.5)           | 466 (69.6)  |         |                                                                |
| Canada                                    | 12 (4.9)             | 23 (4.4)    |         | 32 (6.8)             | 58 (8.7)    |         |                                                                |
| Europe                                    | 36 (14.8)            | 99 (18.8)   |         | 48 (10.2)            | 100 (14.9)  |         |                                                                |
| Other                                     | 7 (2.9)              | 59 (11.2)   |         | 21 (4.5)             | 46 (6.9)    |         |                                                                |

<sup>a</sup> P-value testing an interaction between each variable listed and the year in the assessment of gender differences.

Table 2. Comparison of author contributions by gender, stratified by the year of publication.

| Variables                                                           | 2000                 |             |         | 2015                 |             |         | Change in gender differences over time (p-value <sup>a</sup> ) |
|---------------------------------------------------------------------|----------------------|-------------|---------|----------------------|-------------|---------|----------------------------------------------------------------|
|                                                                     | Women (n=243, 31.5%) | Men (n=528) | p-value | Women (n=469, 41.2%) | Men (n=670) | p-value |                                                                |
| Contributions in the paper, n (%)                                   |                      |             |         |                      |             |         |                                                                |
| Conception and design                                               | 134 (55.1)           | 323 (61.2)  | 0.03    | 223 (47.6)           | 372 (55.5)  | 0.001   | 0.81                                                           |
| Analysis and interpretation of the data                             | 176 (72.4)           | 362 (68.6)  | 0.78    | 342 (72.9)           | 496 (74.0)  | 0.22    | 0.58                                                           |
| Drafting of the article                                             | 110 (45.3)           | 206 (39.0)  | 0.35    | 222 (47.3)           | 298 (44.5)  | 0.61    | 0.67                                                           |
| Critical revision of the article for important intellectual content | 171 (70.4)           | 426 (80.7)  | <0.001  | 317 (67.6)           | 535 (79.9)  | <0.001  | 0.94                                                           |
| Provision of materials/patients                                     | 106 (43.6)           | 244 (46.2)  | 0.75    | 98 (20.9)            | 178 (26.6)  | 0.05    | 0.29                                                           |
| Obtaining of funding                                                | 39 (16.1)            | 114 (21.6)  | 0.02    | 66 (14.1)            | 134 (20.0)  | <0.001  | 0.60                                                           |
| Statistical expertise                                               | 49 (20.2)            | 125 (23.7)  | 0.24    | 103 (22.0)           | 157 (23.4)  | 0.56    | 0.60                                                           |
| Administrative, technical and logistic support                      | 85 (35.0)            | 137 (26.0)  | 0.02    | 147 (31.3)           | 178 (26.6)  | 0.27    | 0.25                                                           |
| Collection and assembly of data                                     | 121 (49.8)           | 242 (45.8)  | 0.05    | 260 (55.4)           | 306 (45.7)  | 0.008   | 0.90                                                           |
| Final approval of the article                                       | 196 (80.7)           | 453 (85.8)  | 0.04    | 404 (86.1)           | 602 (89.9)  | 0.08    | 0.69                                                           |
| Author position, n (%)                                              |                      |             | 0.01    |                      |             | 0.003   | 0.84                                                           |
| First                                                               | 35 (14.4)            | 69 (13.1)   |         | 55 (11.7)            | 74 (11.0)   |         |                                                                |
| Second                                                              | 40 (16.5)            | 51 (9.7)    |         | 51 (10.9)            | 56 (8.4)    |         |                                                                |
| Middle                                                              | 117 (48.1)           | 256 (48.5)  |         | 290 (61.8)           | 377 (56.3)  |         |                                                                |
| Next-to-last                                                        | 29 (11.9)            | 70 (13.3)   |         | 40 (8.5)             | 77 (11.5)   |         |                                                                |
| Last                                                                | 22 (9.0)             | 82 (15.5)   |         | 33 (7.0)             | 86 (12.8)   |         |                                                                |

<sup>a</sup> P-value testing an interaction between each variable listed and the year in the assessment of gender differences. All p-values are obtained from mixed-effects logistic regression models.

**Table 3. Association between female gender and 10 contributions to a research paper by year, univariate (left columns) and multivariable models (right columns) after adjustment for academic degrees.**

| Contributions                                                       | Univariate analysis |           |         | Adjusted for degrees |           |         |
|---------------------------------------------------------------------|---------------------|-----------|---------|----------------------|-----------|---------|
|                                                                     | OR                  | 95% CI    | p-value | OR                   | 95% CI    | p-value |
| Conception and design                                               |                     |           |         |                      |           |         |
| 2000                                                                | 0.67                | 0.48-0.95 | 0.026   | 0.86                 | 0.60-1.24 | 0.42    |
| 2015                                                                | 0.64                | 0.49-0.84 | 0.001   | 0.76                 | 0.57-1.02 | 0.06    |
| Analysis and interpretation of data                                 |                     |           |         |                      |           |         |
| 2000                                                                | 0.95                | 0.64-1.39 | 0.78    | 0.99                 | 0.66-1.49 | 0.95    |
| 2015                                                                | 0.83                | 0.61-1.12 | 0.22    | 0.75                 | 0.54-1.04 | 0.09    |
| Drafting of the article                                             |                     |           |         |                      |           |         |
| 2000                                                                | 1.18                | 0.84-1.65 | 0.35    | 1.31                 | 0.92-1.86 | 0.14    |
| 2015                                                                | 1.07                | 0.82-1.39 | 0.61    | 1.16                 | 0.88-1.52 | 0.30    |
| Critical revision of the article for important intellectual content |                     |           |         |                      |           |         |
| 2000                                                                | 0.50                | 0.33-0.75 | <0.001  | 0.69                 | 0.45-1.06 | 0.09    |
| 2015                                                                | 0.51                | 0.38-0.70 | <0.001  | 0.64                 | 0.46-0.89 | 0.008   |
| Provision of materials/patients                                     |                     |           |         |                      |           |         |
| 2000                                                                | 0.94                | 0.64-1.37 | 0.75    | 1.57                 | 1.03-2.40 | 0.04    |
| 2015                                                                | 0.72                | 0.51-1.00 | 0.05    | 1.12                 | 0.78-1.62 | 0.54    |
| Statistical expertise                                               |                     |           |         |                      |           |         |
| 2000                                                                | 0.79                | 0.53-1.17 | 0.24    | 0.53                 | 0.34-0.82 | 0.005   |
| 2015                                                                | 0.91                | 0.68-1.23 | 0.56    | 0.59                 | 0.42-0.83 | 0.002   |
| Obtaining of funding                                                |                     |           |         |                      |           |         |
| 2000                                                                | 0.60                | 0.39-0.94 | 0.02    | 0.81                 | 0.51-1.28 | 0.36    |
| 2015                                                                | 0.52                | 0.36-0.74 | <0.001  | 0.62                 | 0.43-0.91 | 0.01    |
| Administrative, technical, and logistic support                     |                     |           |         |                      |           |         |
| 2000                                                                | 1.55                | 1.08-2.25 | 0.2     | 1.10                 | 0.74-1.63 | 0.63    |
| 2015                                                                | 1.18                | 0.88-1.58 | 0.26    | 1.01                 | 0.75-1.38 | 0.93    |
| Collection and assembly of data                                     |                     |           |         |                      |           |         |
| 2000                                                                | 1.42                | 0.99-2.03 | 0.05    | 1.13                 | 0.78-1.64 | 0.52    |
| 2015                                                                | 1.46                | 1.11-1.93 | 0.008   | 1.35                 | 1.01-1.81 | 0.04    |
| Final approval                                                      |                     |           |         |                      |           |         |
| 2000                                                                | 0.60                | 0.37-0.97 | 0.04    | 0.85                 | 0.51-1.41 | 0.52    |
| 2015                                                                | 0.69                | 0.45-1.04 | 0.08    | 0.92                 | 0.59-1.44 | 0.73    |

Abbreviations : OR : odds ratio ; 95% CI: 95% confidence interval

**Table 4. Association between female gender and position on the byline by year, in univariate analysis (left columns) and after adjustment for research contributions to the project (right columns).**

| Author position (vs. middle) <sup>a</sup> | Univariate analysis |           |         | Adjusted for contributions |           |         |
|-------------------------------------------|---------------------|-----------|---------|----------------------------|-----------|---------|
|                                           | OR                  | 95% CI    | p-value | OR                         | 95% CI    | p-value |
| First                                     |                     |           |         |                            |           |         |
| 2000                                      | 0.99                | 0.56-1.73 | 0.96    | 1.23                       | 0.35-4.33 | 0.74    |
| 2015                                      | 1.00                | 0.65-1.56 | 0.98    | 1.44                       | 0.69-3.01 | 0.33    |
| Second                                    |                     |           |         |                            |           |         |
| 2000                                      | 1.55                | 0.89-2.72 | 0.12    | 1.94                       | 1.05-3.59 | 0.03    |
| 2015                                      | 1.12                | 0.68-1.84 | 0.67    | 1.28                       | 0.75-2.21 | 0.37    |
| Next-to-last                              |                     |           |         |                            |           |         |
| 2000                                      | 0.63                | 0.34-1.17 | 0.14    | 0.73                       | 0.39-1.36 | 0.33    |
| 2015                                      | 0.58                | 0.36-0.93 | 0.02    | 0.59                       | 0.36-0.96 | 0.03    |
| Last                                      |                     |           |         |                            |           |         |
| 2000                                      | 0.55                | 0.30-1.01 | 0.05    | 0.80                       | 0.32-1.98 | 0.62    |
| 2015                                      | 0.46                | 0.28-0.75 | 0.002   | 0.71                       | 0.37-1.37 | 0.31    |

Abbreviations : OR : odds ratio ; 95% CI: 95% confidence interval

<sup>a</sup> 36 articles with four or fewer authors were excluded from the analyses.



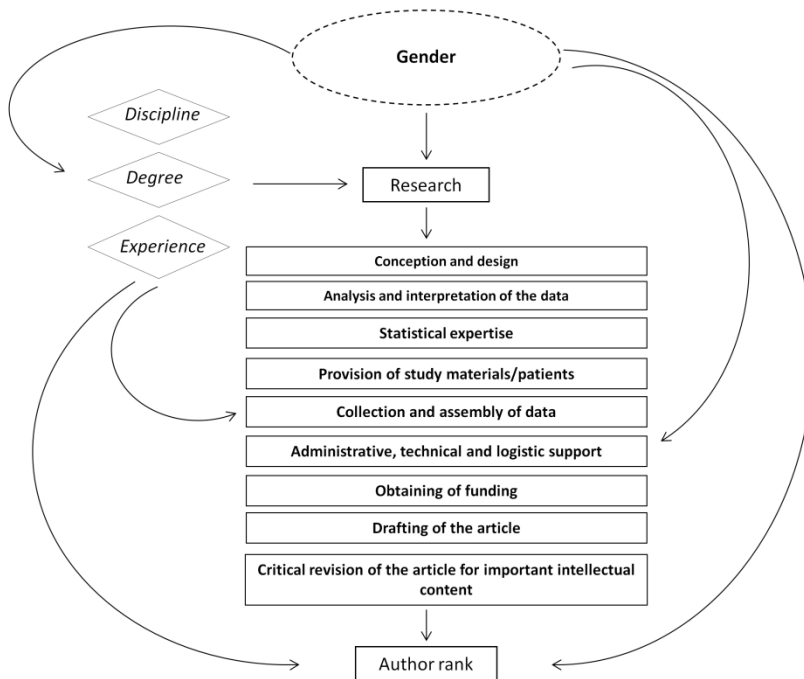

Figure 1

**STROBE 2007 (v4) Statement—Checklist of items that should be included in reports of *cross-sectional studies***

| Section/Topic                | Item # | Recommendation                                                                                                                                                                       | Reported on page # |
|------------------------------|--------|--------------------------------------------------------------------------------------------------------------------------------------------------------------------------------------|--------------------|
| <b>Title and abstract</b>    | 1      | (a) Indicate the study’s design with a commonly used term in the title or the abstract                                                                                               | 1-2                |
|                              |        | (b) Provide in the abstract an informative and balanced summary of what was done and what was found                                                                                  | 2                  |
| <b>Introduction</b>          |        |                                                                                                                                                                                      |                    |
| Background/rationale         | 2      | Explain the scientific background and rationale for the investigation being reported                                                                                                 | 5-6                |
| Objectives                   | 3      | State specific objectives, including any prespecified hypotheses                                                                                                                     | 5                  |
| <b>Methods</b>               |        |                                                                                                                                                                                      |                    |
| Study design                 | 4      | Present key elements of study design early in the paper                                                                                                                              | 7                  |
| Setting                      | 5      | Describe the setting, locations, and relevant dates, including periods of recruitment, exposure, follow-up, and data collection                                                      | 7                  |
| Participants                 | 6      | (a) Give the eligibility criteria, and the sources and methods of selection of participants                                                                                          | 7                  |
| Variables                    | 7      | Clearly define all outcomes, exposures, predictors, potential confounders, and effect modifiers. Give diagnostic criteria, if applicable                                             | 7-8                |
| Data sources/<br>measurement | 8*     | For each variable of interest, give sources of data and details of methods of assessment (measurement). Describe comparability of assessment methods if there is more than one group | 7-8                |
| Bias                         | 9      | Describe any efforts to address potential sources of bias                                                                                                                            | 7                  |
| Study size                   | 10     | Explain how the study size was arrived at                                                                                                                                            | 8                  |
| Quantitative variables       | 11     | Explain how quantitative variables were handled in the analyses. If applicable, describe which groupings were chosen and why                                                         | NA                 |
| Statistical methods          | 12     | (a) Describe all statistical methods, including those used to control for confounding                                                                                                | 9-10               |
|                              |        | (b) Describe any methods used to examine subgroups and interactions                                                                                                                  | 9                  |
|                              |        | (c) Explain how missing data were addressed                                                                                                                                          | NA                 |
|                              |        | (d) If applicable, describe analytical methods taking account of sampling strategy                                                                                                   | NA                 |
|                              |        | (e) Describe any sensitivity analyses                                                                                                                                                | NA                 |
| <b>Results</b>               |        |                                                                                                                                                                                      |                    |

|                          |     |                                                                                                                                                                                                              |            |
|--------------------------|-----|--------------------------------------------------------------------------------------------------------------------------------------------------------------------------------------------------------------|------------|
| Participants             | 13* | (a) Report numbers of individuals at each stage of study—eg numbers potentially eligible, examined for eligibility, confirmed eligible, included in the study, completing follow-up, and analysed            | 10         |
|                          |     | (b) Give reasons for non-participation at each stage                                                                                                                                                         | NA         |
|                          |     | (c) Consider use of a flow diagram                                                                                                                                                                           | NA         |
| Descriptive data         | 14* | (a) Give characteristics of study participants (eg demographic, clinical, social) and information on exposures and potential confounders                                                                     | 10+Table 1 |
|                          |     | (b) Indicate number of participants with missing data for each variable of interest                                                                                                                          | NA         |
| Outcome data             | 15* | Report numbers of outcome events or summary measures                                                                                                                                                         | Table 2    |
| Main results             | 16  | (a) Give unadjusted estimates and, if applicable, confounder-adjusted estimates and their precision (eg, 95% confidence interval). Make clear which confounders were adjusted for and why they were included | Tables 3-4 |
|                          |     | (b) Report category boundaries when continuous variables were categorized                                                                                                                                    | NA         |
|                          |     | (c) If relevant, consider translating estimates of relative risk into absolute risk for a meaningful time period                                                                                             | NA         |
| Other analyses           | 17  | Report other analyses done—eg analyses of subgroups and interactions, and sensitivity analyses                                                                                                               | NA         |
| <b>Discussion</b>        |     |                                                                                                                                                                                                              |            |
| Key results              | 18  | Summarise key results with reference to study objectives                                                                                                                                                     | 11         |
| Limitations              | 19  | Discuss limitations of the study, taking into account sources of potential bias or imprecision. Discuss both direction and magnitude of any potential bias                                                   | 14         |
| Interpretation           | 20  | Give a cautious overall interpretation of results considering objectives, limitations, multiplicity of analyses, results from similar studies, and other relevant evidence                                   | 12-14      |
| Generalisability         | 21  | Discuss the generalisability (external validity) of the study results                                                                                                                                        | 14-15      |
| <b>Other information</b> |     |                                                                                                                                                                                                              |            |
| Funding                  | 22  | Give the source of funding and the role of the funders for the present study and, if applicable, for the original study on which the present article is based                                                | NA         |

\*Give information separately for cases and controls in case-control studies and, if applicable, for exposed and unexposed groups in cohort and cross-sectional studies.

**Note:** An Explanation and Elaboration article discusses each checklist item and gives methodological background and published examples of transparent reporting. The STROBE checklist is best used in conjunction with this article (freely available on the Web sites of PLoS Medicine at <http://www.plosmedicine.org/>, Annals of Internal Medicine at <http://www.annals.org/>, and Epidemiology at <http://www.epidem.com/>). Information on the STROBE Initiative is available at [www.strobe-statement.org](http://www.strobe-statement.org).
